# Supplementary material for: Synthesis, characterization, photophysical, and photochemical studies of BODIPY derivatives
Source: Royal Society of Chemistry journal article supplement (doi:10.1039/d2nj03631b), 2022-01-01
Supplement: d2nj03631b1.pdf [file d2nj03631b1.pdf]

## Synthesis, Characterization, Photophysical and Photochemical Studies of BODIPY derivatives

Ezel ÖZTÜRK GÜNDÜZ<sup>a</sup>, Hande ESERCI<sup>a</sup>, Berkan TASASIZ<sup>a</sup>, Elif YILDIZ GÜL<sup>b</sup>, Esra  
TANRIVERDI EÇIK<sup>b</sup>, Elif OKUTAN<sup>a\*</sup>

<sup>a</sup> Department of Chemistry, Faculty of Science, Gebze Technical University, Gebze, Kocaeli,

|                                                                                                                                       |    |
|---------------------------------------------------------------------------------------------------------------------------------------|----|
| <b>Scheme S1.</b> Synthesis of compounds <b>1-7</b> .....                                                                             | 3  |
| <b>Fig. S1.</b> MALDI-MS spectrum of compound <b>8</b> .....                                                                          | 4  |
| <b>Fig. S2.</b> <sup>1</sup> H NMR spectrum of compound <b>8</b> in CDCl <sub>3</sub> .....                                           | 5  |
| <b>Fig. S3.</b> <sup>13</sup> C NMR spectrum of compound <b>8</b> in CDCl <sub>3</sub> .....                                          | 5  |
| <b>Fig. S4</b> MALDI-MS spectrum of compound <b>9</b> .....                                                                           | 6  |
| <b>Fig. S5</b> <sup>1</sup> H NMR spectrum of compound <b>9</b> in CDCl <sub>3</sub> .....                                            | 7  |
| <b>Fig. S6</b> <sup>13</sup> C NMR spectrum of compound <b>9</b> in CDCl <sub>3</sub> .....                                           | 8  |
| <b>Fig. S7</b> MALDI-MS spectrum of compound <b>10</b> .....                                                                          | 9  |
| <b>Fig. S8</b> <sup>1</sup> H NMR spectrum of compound <b>10</b> in CDCl <sub>3</sub> .....                                           | 10 |
| <b>Fig. S9</b> <sup>13</sup> C NMR spectrum of compound <b>10</b> in CDCl <sub>3</sub> .....                                          | 11 |
| <b>Fig. S10</b> MALDI-MS spectrum of compound <b>11</b> .....                                                                         | 12 |
| <b>Fig. S11</b> <sup>1</sup> H NMR spectrum of compound <b>11</b> in CDCl <sub>3</sub> .....                                          | 13 |
| <b>Fig. S12</b> <sup>13</sup> C NMR spectrum of compound <b>11</b> in CDCl <sub>3</sub> .....                                         | 14 |
| <b>Fig. S13</b> MALDI-MS spectrum of compound <b>12</b> .....                                                                         | 15 |
| <b>Fig. S14</b> <sup>1</sup> H NMR spectrum of compound <b>12</b> in CDCl <sub>3</sub> .....                                          | 16 |
| <b>Fig. S15</b> <sup>13</sup> C NMR spectrum of compound <b>12</b> in CDCl <sub>3</sub> .....                                         | 17 |
| <b>Fig. S16</b> MALDI-MS spectrum of compound <b>13</b> .....                                                                         | 18 |
| <b>Fig. S17</b> <sup>1</sup> H NMR spectrum of compound <b>13</b> in CDCl <sub>3</sub> .....                                          | 19 |
| <b>Fig. S18</b> <sup>13</sup> C NMR spectrum of compound <b>13</b> in CDCl <sub>3</sub> .....                                         | 19 |
| <b>Fig. S19</b> MALDI-MS spectrum of compound <b>14</b> .....                                                                         | 20 |
| <b>Fig. S20</b> <sup>1</sup> H NMR spectrum of compound <b>14</b> in CDCl <sub>3</sub> .....                                          | 21 |
| <b>Fig. S21</b> <sup>13</sup> C NMR spectrum of compound <b>14</b> in CDCl <sub>3</sub> .....                                         | 22 |
| <b>Fig. S22</b> MALDI-MS spectrum of compound <b>15</b> .....                                                                         | 23 |
| <b>Fig. S23</b> <sup>1</sup> H NMR spectrum of compound <b>15</b> in CDCl <sub>3</sub> .....                                          | 24 |
| <b>Fig. S24</b> <sup>13</sup> C NMR spectrum of compound <b>15</b> in CDCl <sub>3</sub> .....                                         | 24 |
| <b>Fig. S25</b> MALDI-MS spectrum of compound <b>16</b> .....                                                                         | 25 |
| <b>Fig. S26</b> <sup>1</sup> H NMR spectrum of compound <b>16</b> in CDCl <sub>3</sub> .....                                          | 26 |
| <b>Fig. S27</b> <sup>13</sup> C NMR spectrum of compound <b>16</b> in CDCl <sub>3</sub> .....                                         | 26 |
| <b>Fig. S28</b> Absorbance spectra of compounds (a) <b>8</b> , (b) <b>9</b> and (c) <b>10</b> in different solvents (1 μM).....       | 27 |
| <b>Fig. S29</b> Absorbance spectra of compounds (a) <b>11</b> , (b) <b>12</b> and (c) <b>13</b> in different solvents (1 μM).....     | 27 |
| <b>Fig. S30</b> Absorbance spectra of compounds (a) <b>14</b> , (b) <b>15</b> and (c) <b>16</b> in different solvents (1 μM).....     | 27 |
| <b>Fig. S31</b> Absorption spectra of compounds (a) <b>8</b> , (b) <b>9</b> and (c) <b>10</b> in DCM at different concentrations .... | 27 |
| <b>Fig. S32</b> Absorption spectra of compounds (a) <b>11</b> , (b) <b>12</b> and (c) <b>13</b> in DCM at different concentrations    | 28 |

|                                                                                                                                                                                                                           |    |
|---------------------------------------------------------------------------------------------------------------------------------------------------------------------------------------------------------------------------|----|
| <b>Fig. S33</b> Absorption spectra of compounds (a) <b>14</b> , (b) <b>15</b> and (c) <b>16</b> in DCM at different concentrations                                                                                        | 28 |
| <b>Fig. S34</b> Absorption spectra of compounds (a) <b>8</b> , (b) <b>9</b> and (c) <b>10</b> in DMSO at different concentrations ..                                                                                      | 28 |
| <b>Fig. S35</b> Absorption spectra of compounds (a) <b>11</b> , (b) <b>12</b> and (c) <b>13</b> in DMSO at different .....                                                                                                | 29 |
| <b>Fig. S36</b> Absorption spectra of compounds (a) <b>14</b> , (b) <b>15</b> and (c) <b>16</b> in DMSO at different concentrations .....                                                                                 | 29 |
| <b>Fig. S37</b> Fluorescence spectra of compounds (a) <b>8</b> , (b) <b>9</b> and (c) <b>10</b> (0.5 $\mu$ M, $\lambda_{ex}$ :470 nm) in different solvents.....                                                          | 29 |
| <b>Fig. S38</b> Fluorescence spectra of compounds (a) <b>11</b> ( $\lambda_{ex}$ :500 nm), (b) <b>12</b> ( $\lambda_{ex}$ :510 nm) and (c) <b>13</b> ( $\lambda_{ex}$ :510 nm), in different solvents (0.5 $\mu$ M) ..... | 30 |
| <b>Fig. S39</b> Fluorescence spectra of compounds (a) <b>14</b> ( $\lambda_{ex}$ :500 nm), (b) <b>15</b> ( $\lambda_{ex}$ :510 nm) and (c) <b>16</b> ( $\lambda_{ex}$ :510 nm), in different solvents (0.5 $\mu$ M) ..... | 30 |
| <b>Fig. S40</b> Fluorescence decay profiles of compounds <b>11-16</b> in DCM.....                                                                                                                                         | 31 |
| <b>Fig. S41</b> Decrease in absorbance spectra of DPBF in the presence of MB in DMSO.....                                                                                                                                 | 32 |
| <b>Fig. S42</b> Decrease in absorbance spectra of DPBF in the presence of RB in DMSO .....                                                                                                                                | 33 |
| <b>Fig. S43</b> Decrease in absorbance spectra of DHN in the presence of MB .....                                                                                                                                         | 34 |
| <b>Fig. S44</b> Decrease in absorbance spectra of DHN in the presence of RB .....                                                                                                                                         | 35 |

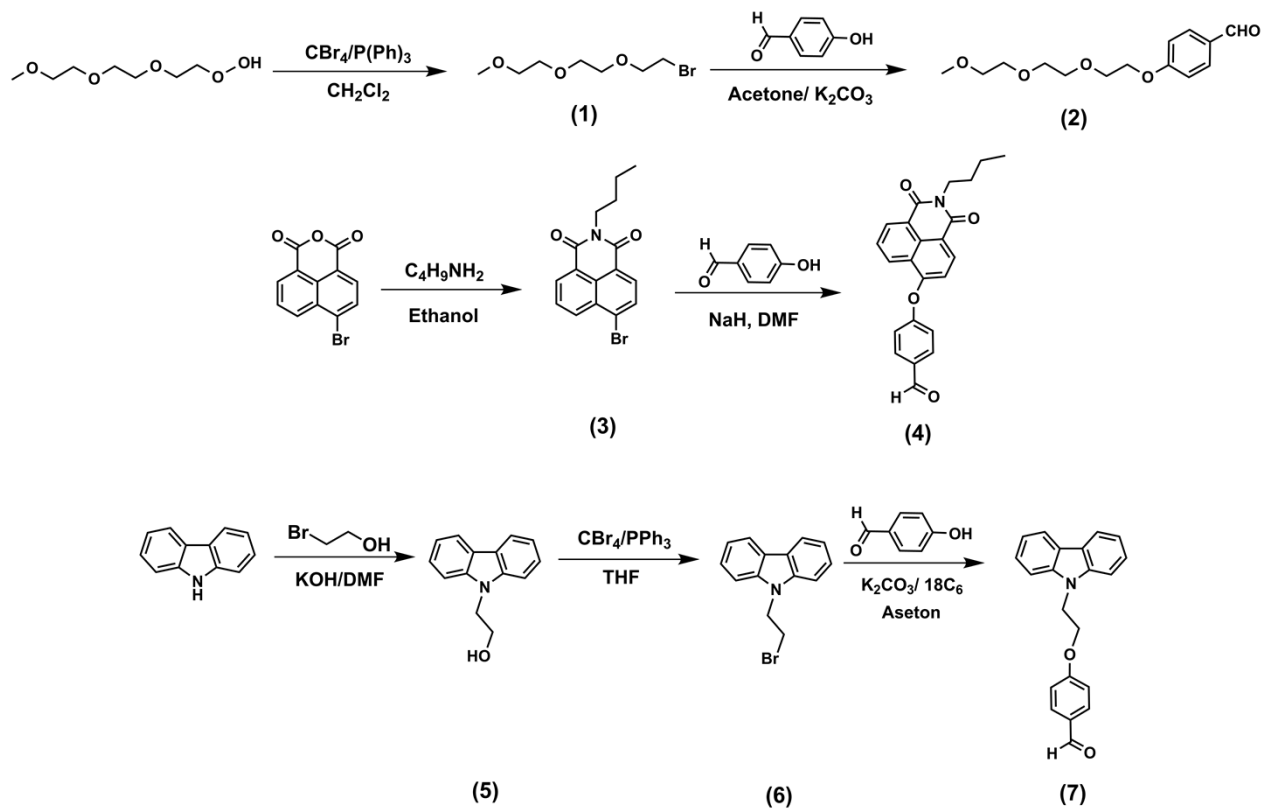

**Scheme S1.** Synthesis of compounds 1-7

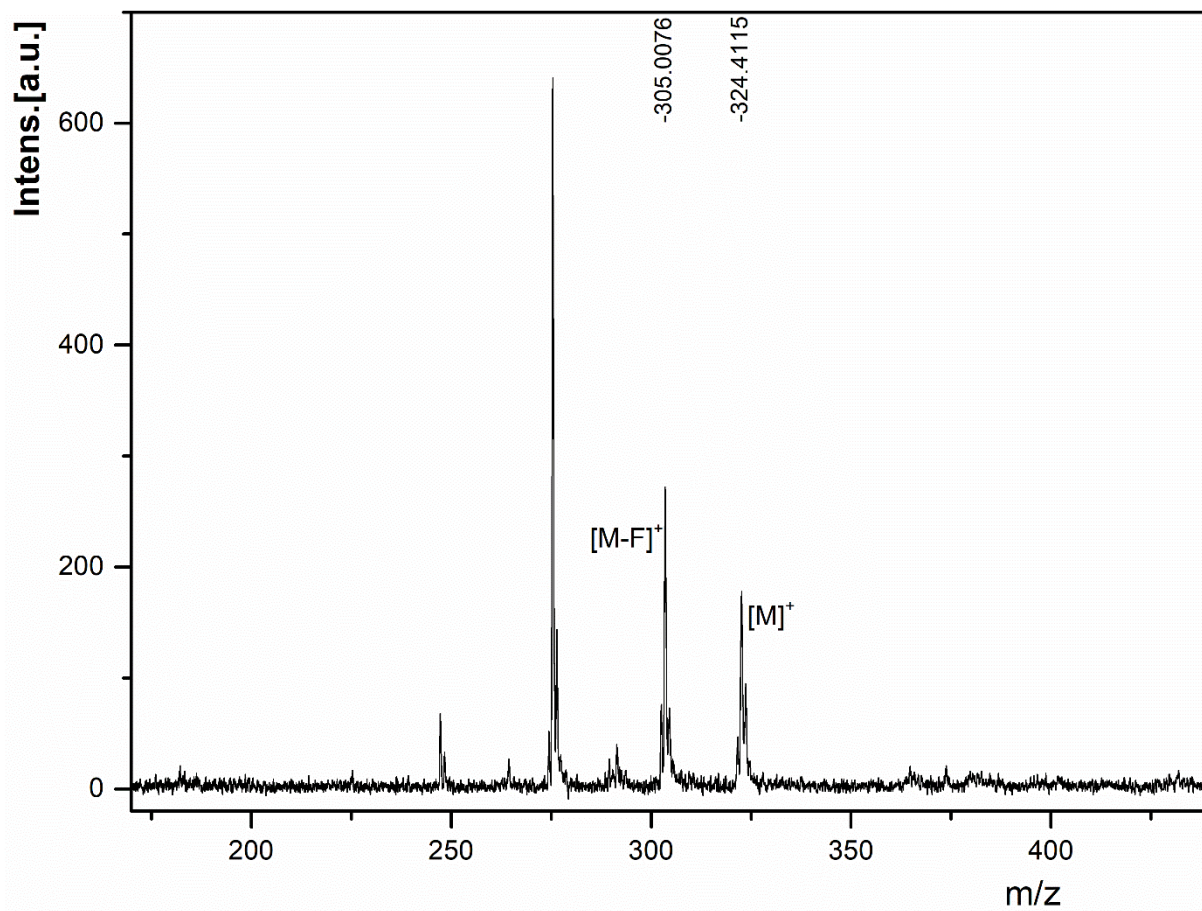

**Fig. S1.** MALDI-MS spectrum of compound **8**

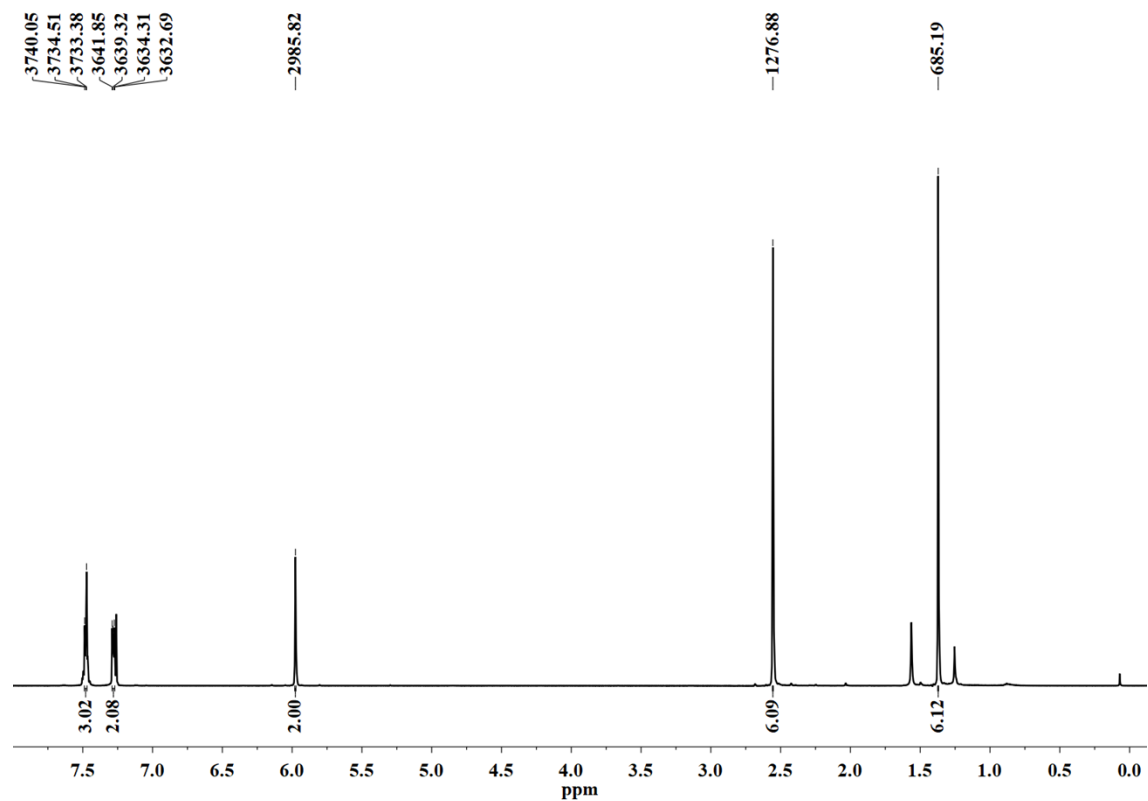

Fig. S2.  $^1\text{H}$  NMR spectrum of compound **8** in  $\text{CDCl}_3$

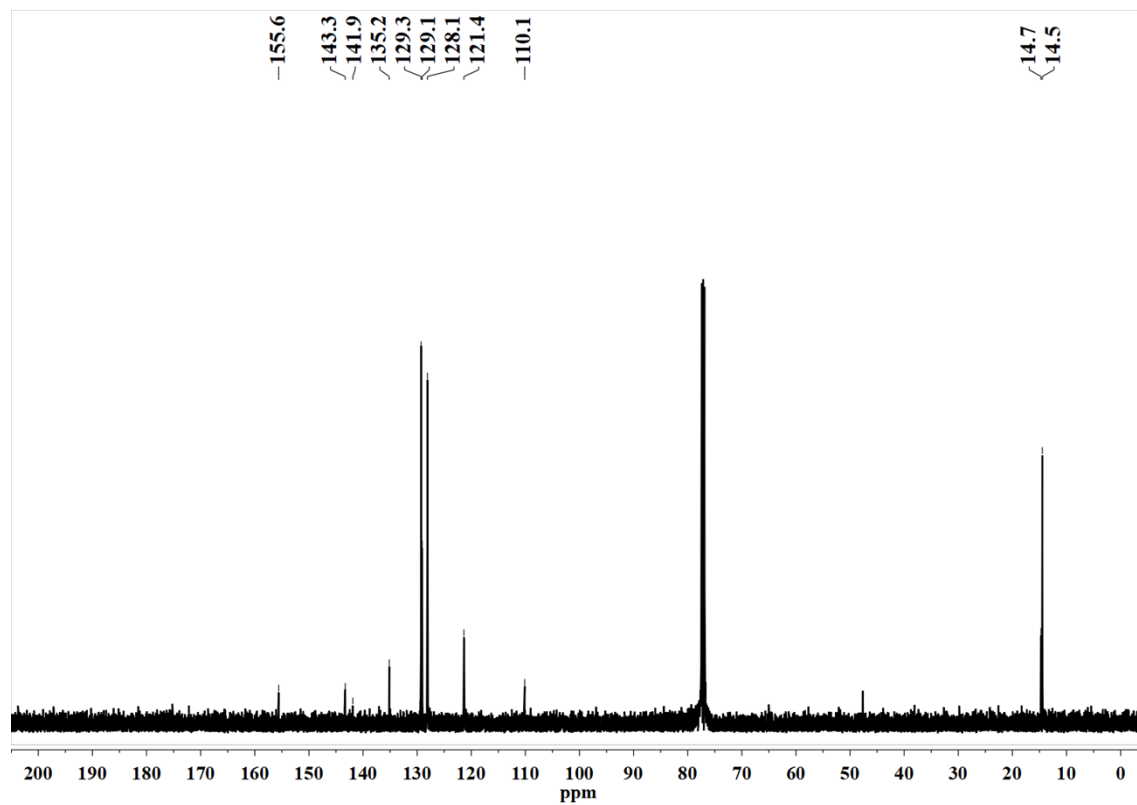

Fig. S3.  $^{13}\text{C}$  NMR spectrum of compound **8** in  $\text{CDCl}_3$

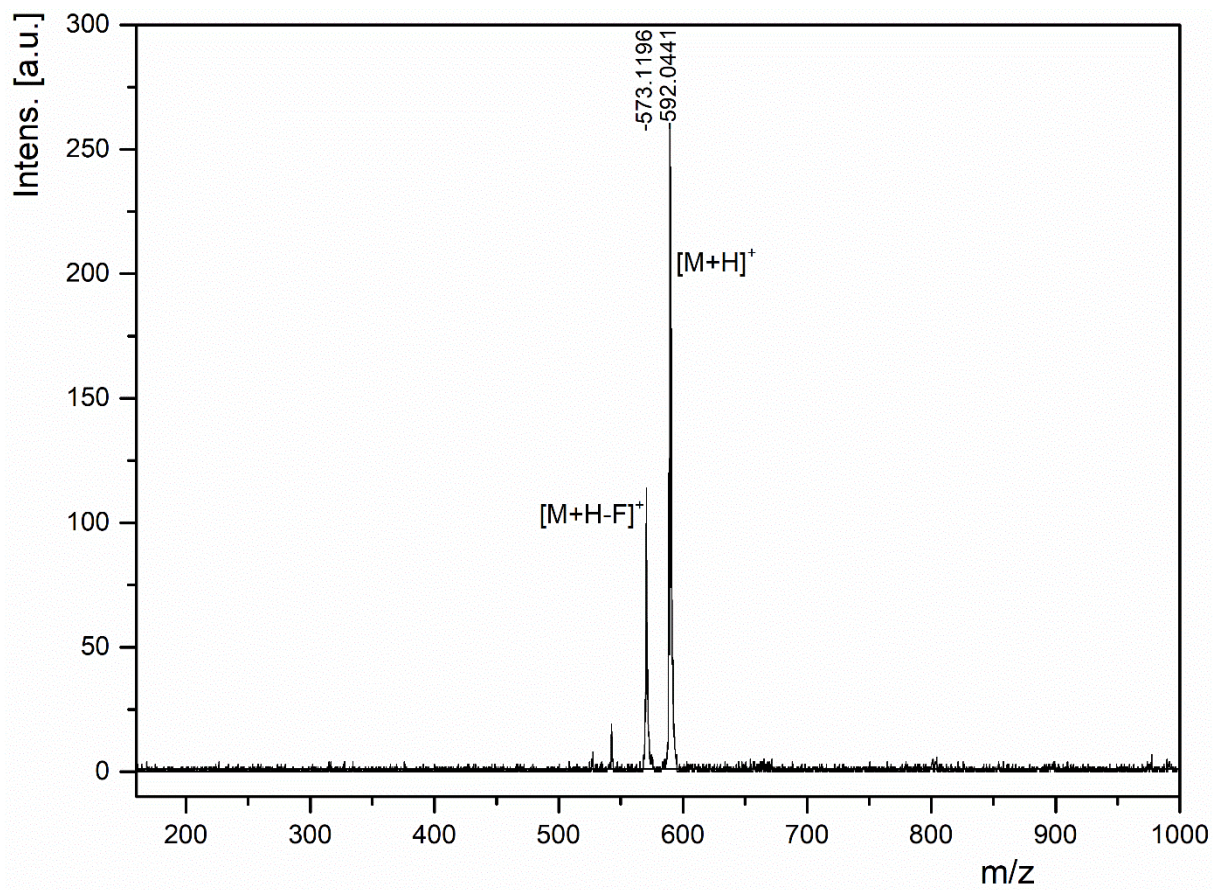

**Fig. S4** MALDI-MS spectrum of compound **9**

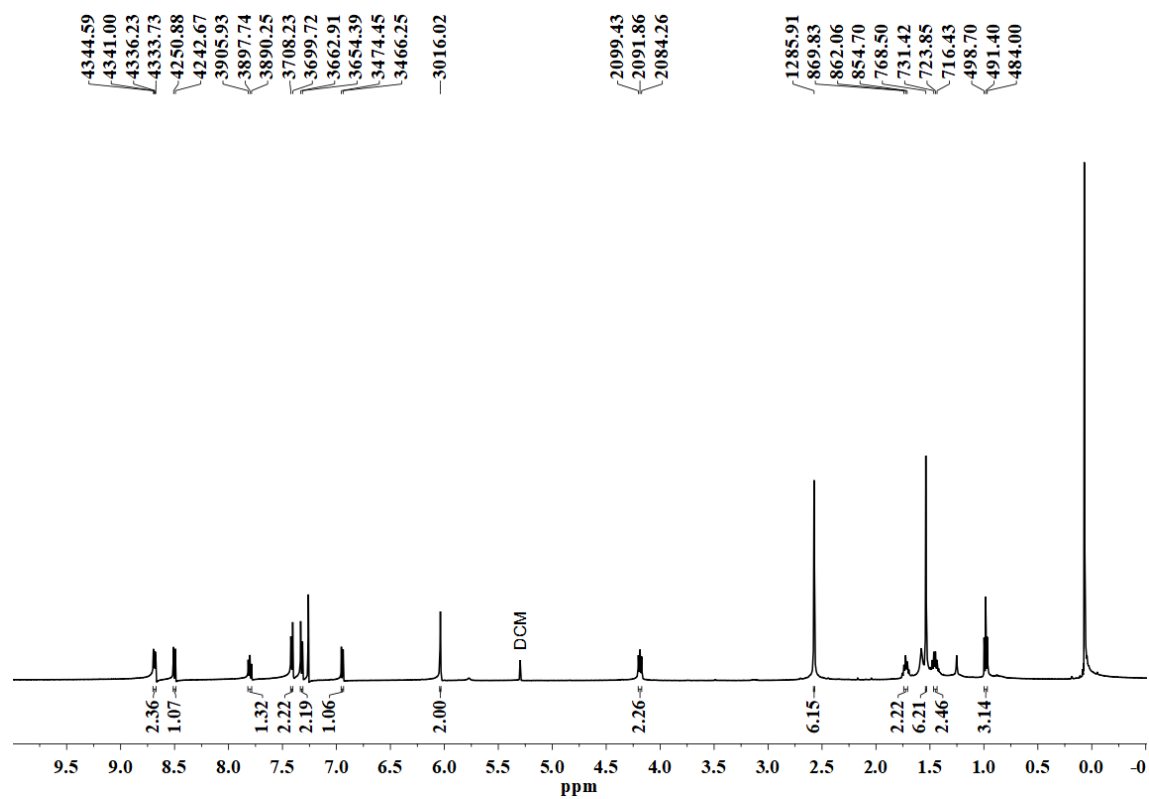

**Fig. S5**  $^1\text{H}$  NMR spectrum of compound **9** in  $\text{CDCl}_3$

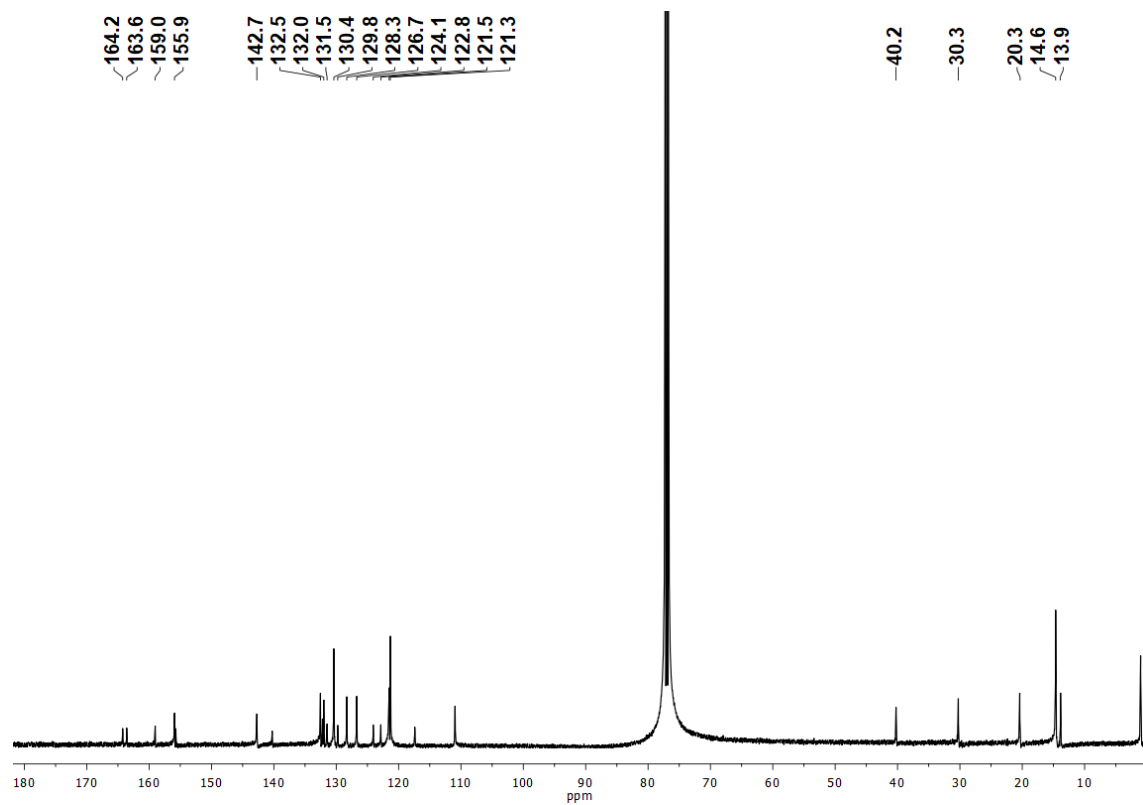

Fig. S6  $^{13}\text{C}$  NMR spectrum of compound **9** in  $\text{CDCl}_3$



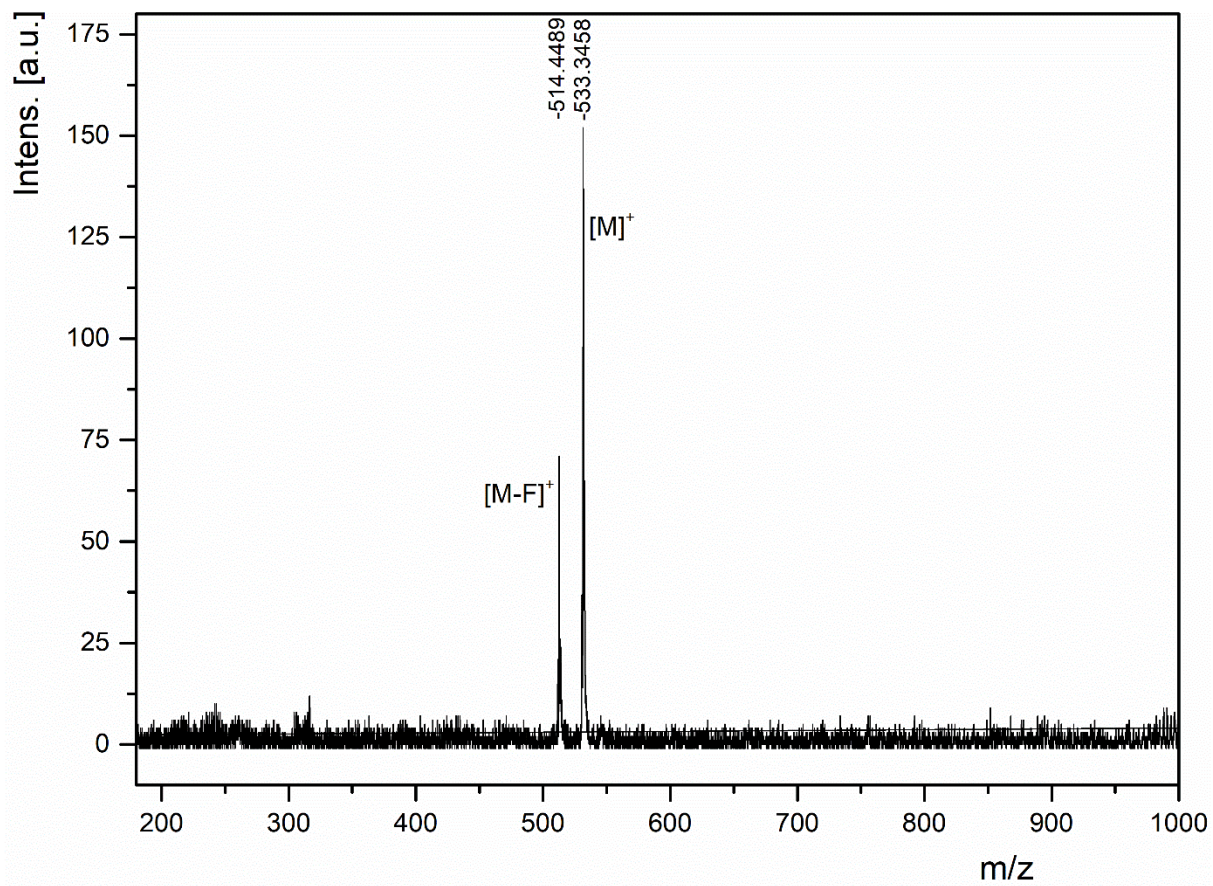

**Fig. S7** MALDI-MS spectrum of compound **10**

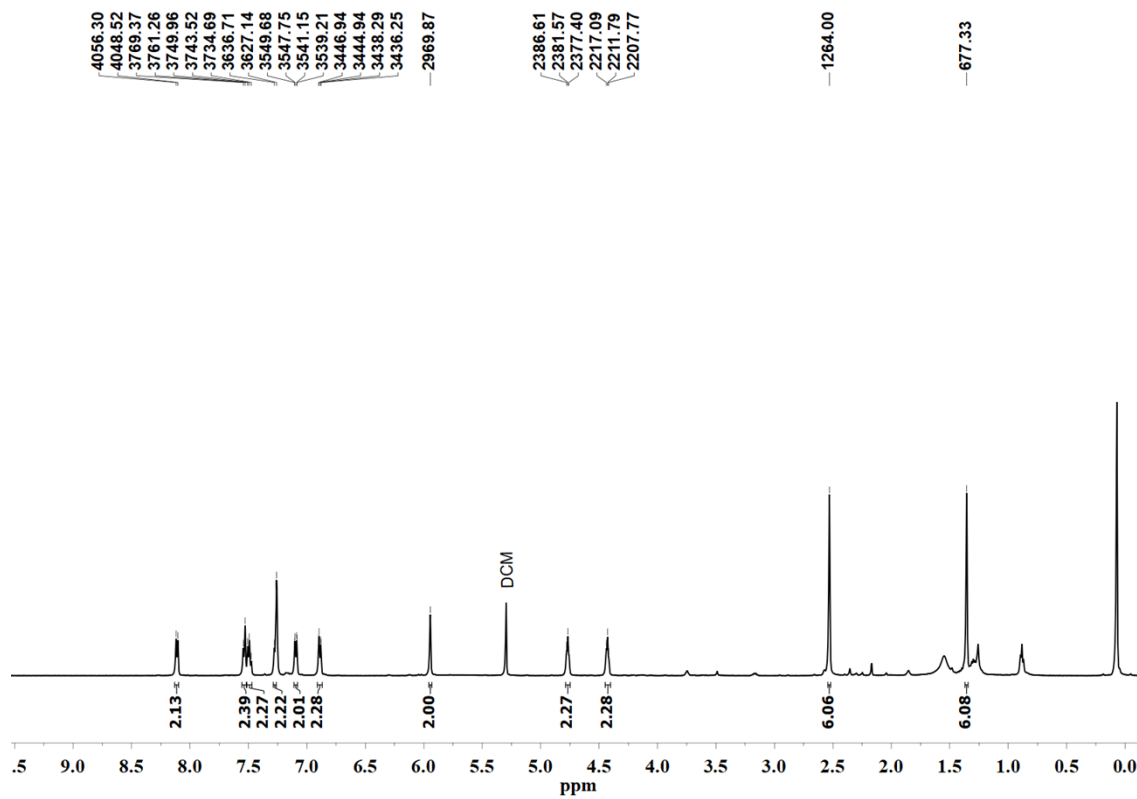

**Fig. S8**  $^1\text{H}$  NMR spectrum of compound **10** in  $\text{CDCl}_3$

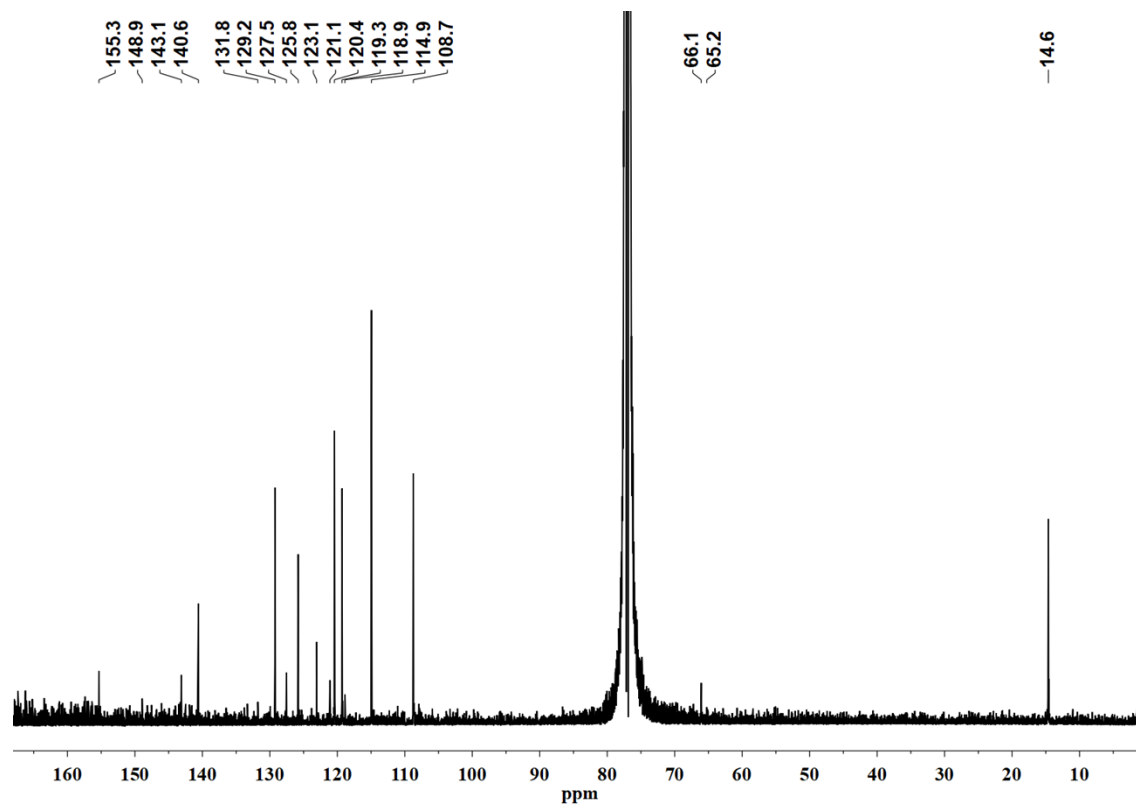

**Fig. S9**  $^{13}\text{C}$  NMR spectrum of compound **10** in  $\text{CDCl}_3$

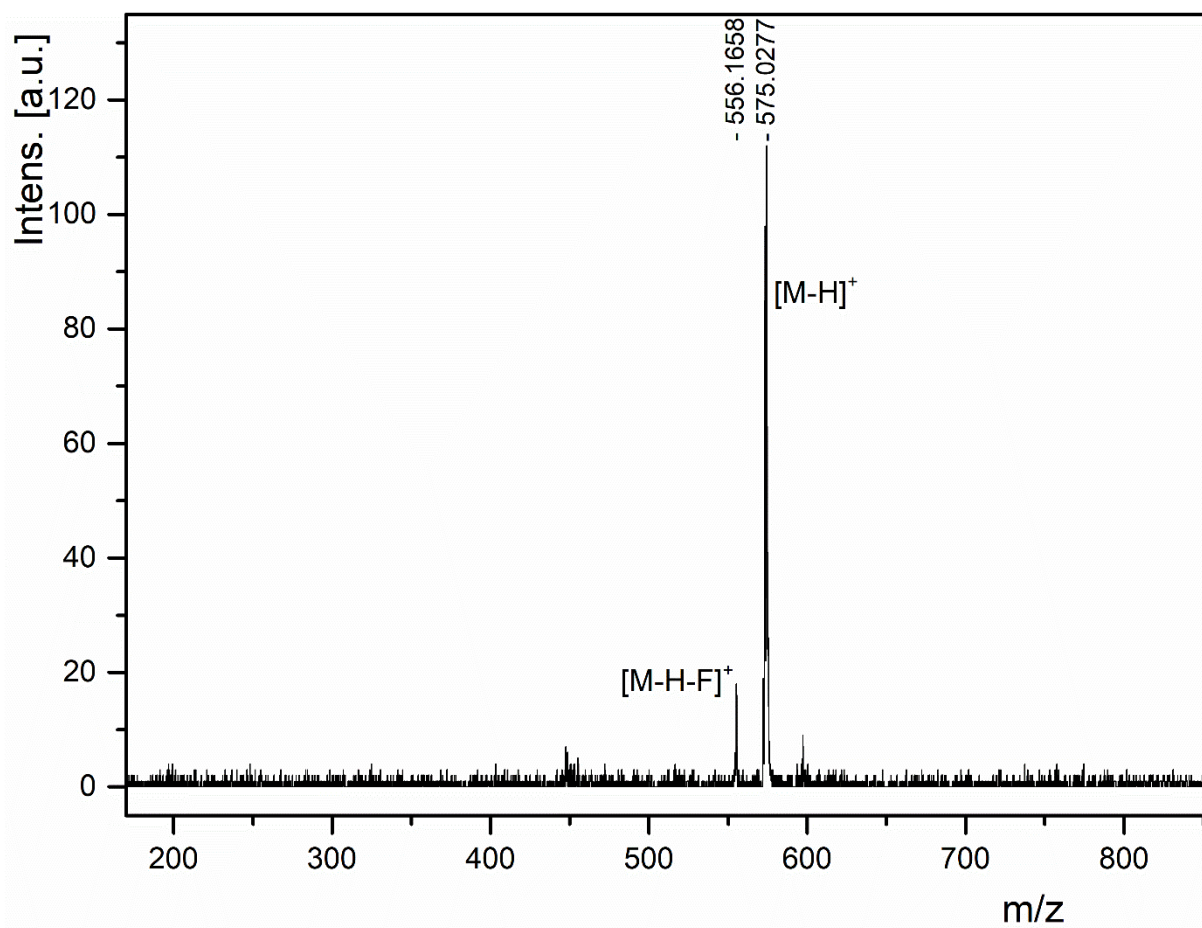

**Fig. S10** MALDI-MS spectrum of compound **11**

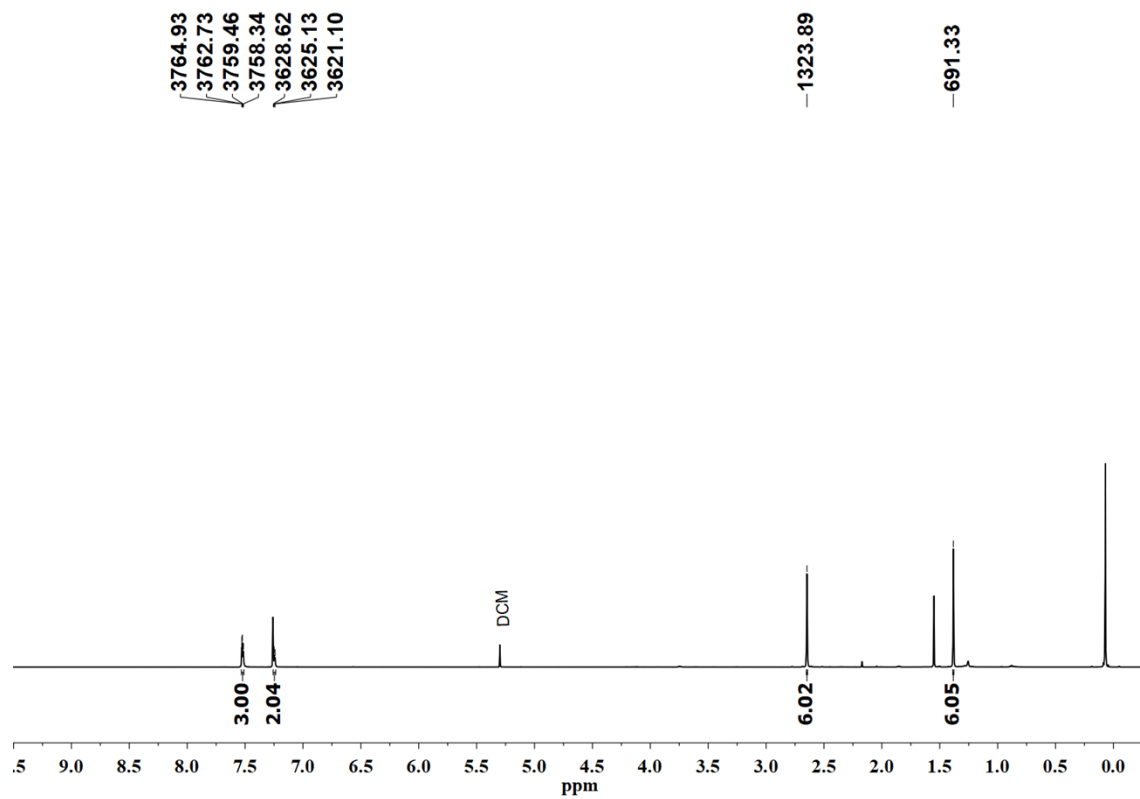

Fig. S11  $^1\text{H}$  NMR spectrum of compound **11** in  $\text{CDCl}_3$

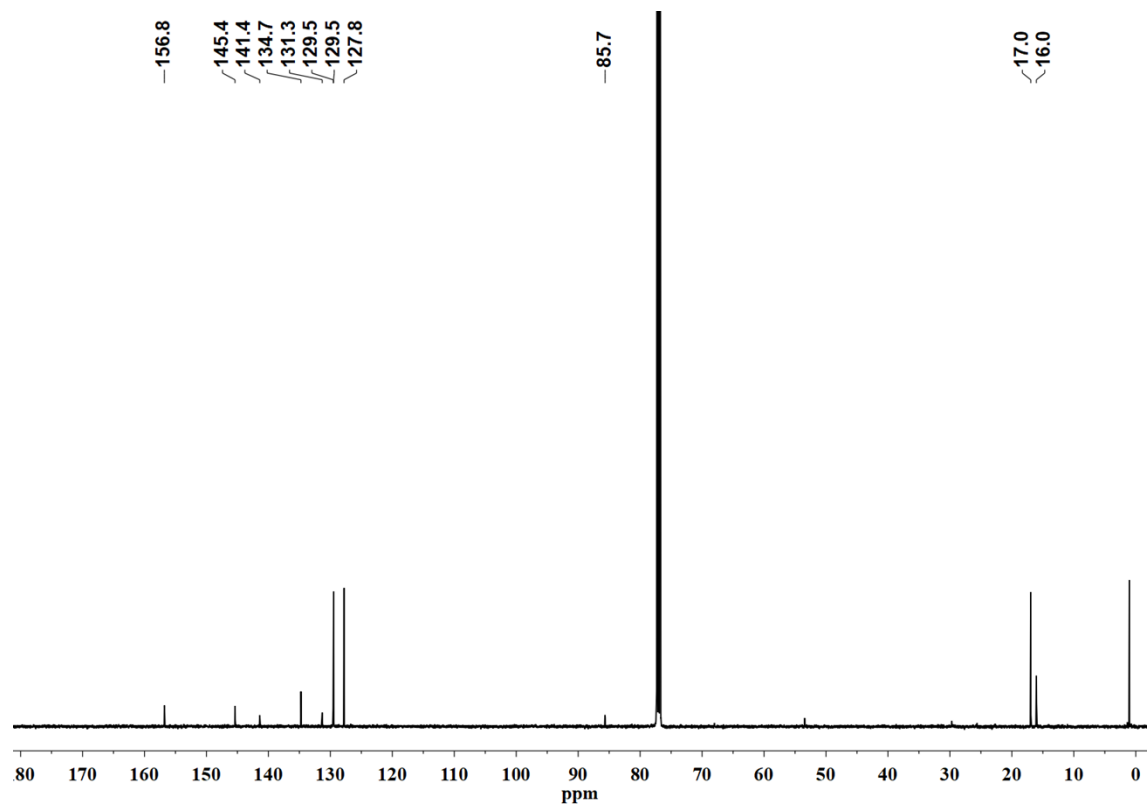

Fig. S12  $^{13}\text{C}$  NMR spectrum of compound **11** in  $\text{CDCl}_3$

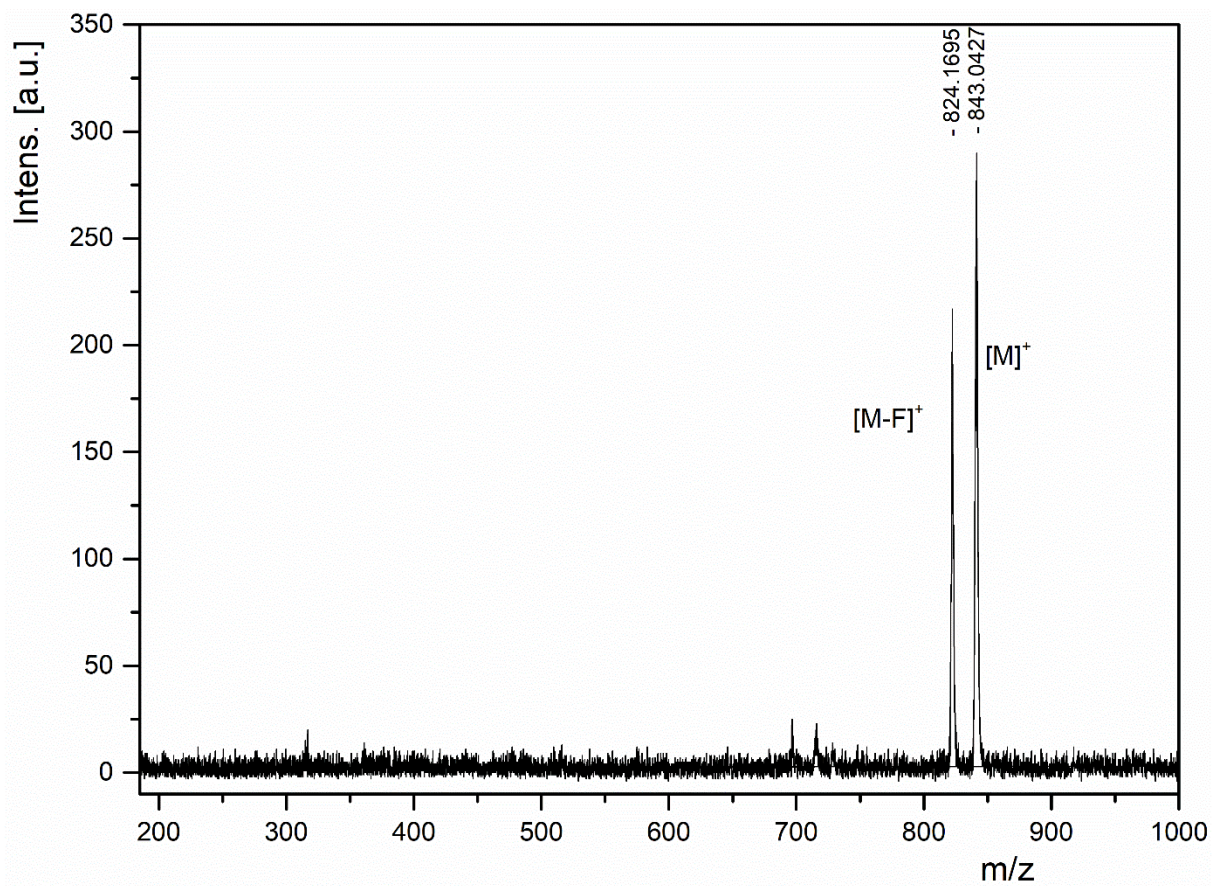

**Fig. S13** MALDI-MS spectrum of compound **12**

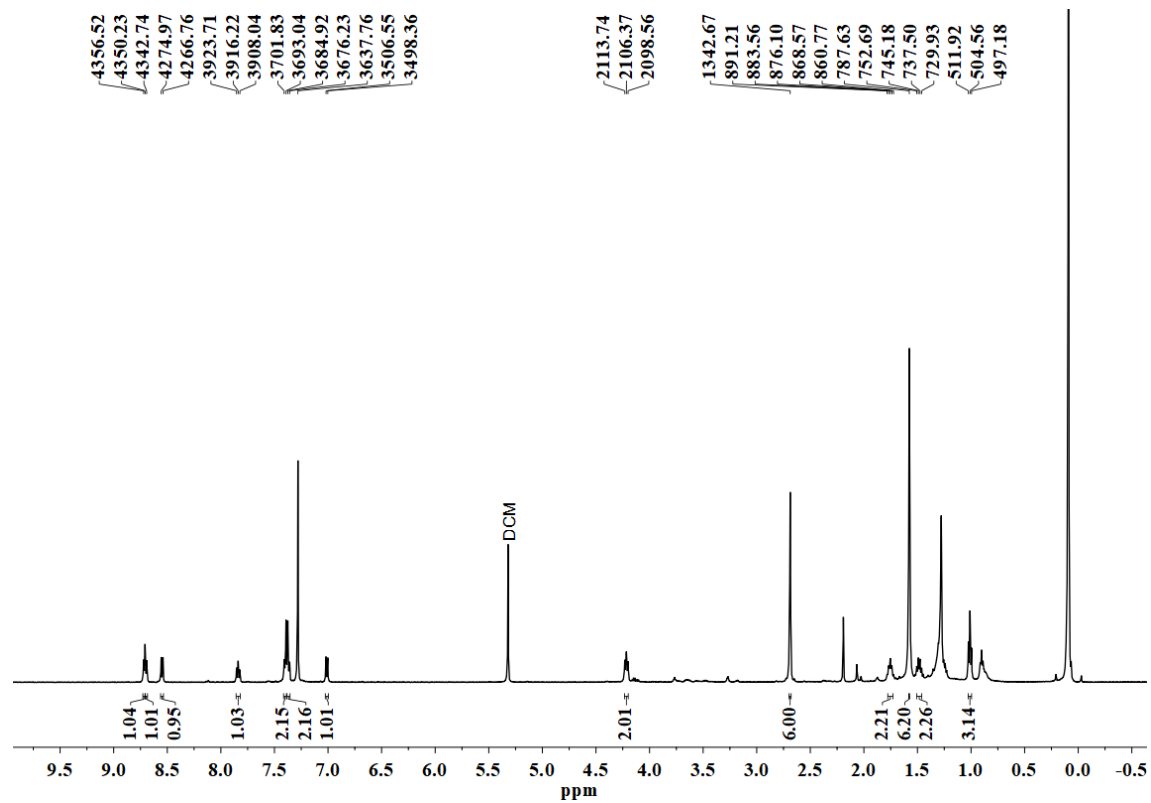

Fig. S14 <sup>1</sup>H NMR spectrum of compound 12 in CDCl<sub>3</sub>



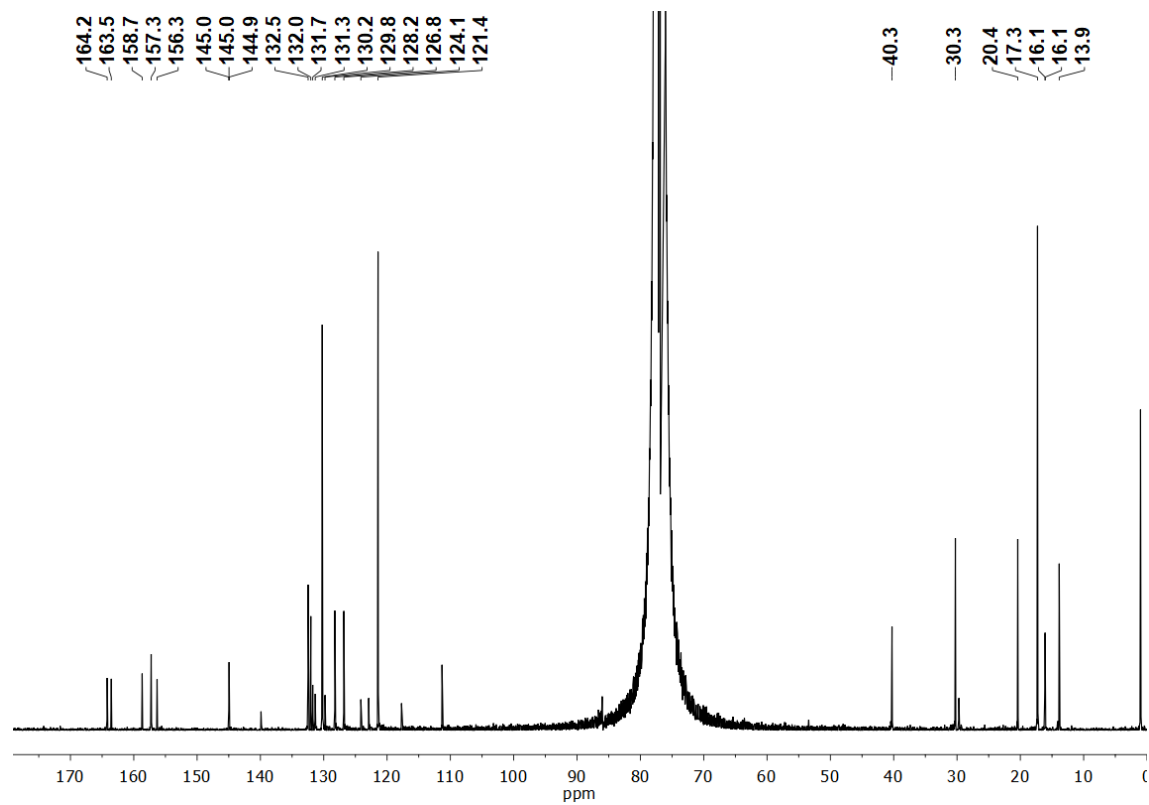

Fig. S15  $^{13}\text{C}$  NMR spectrum of compound **12** in  $\text{CDCl}_3$

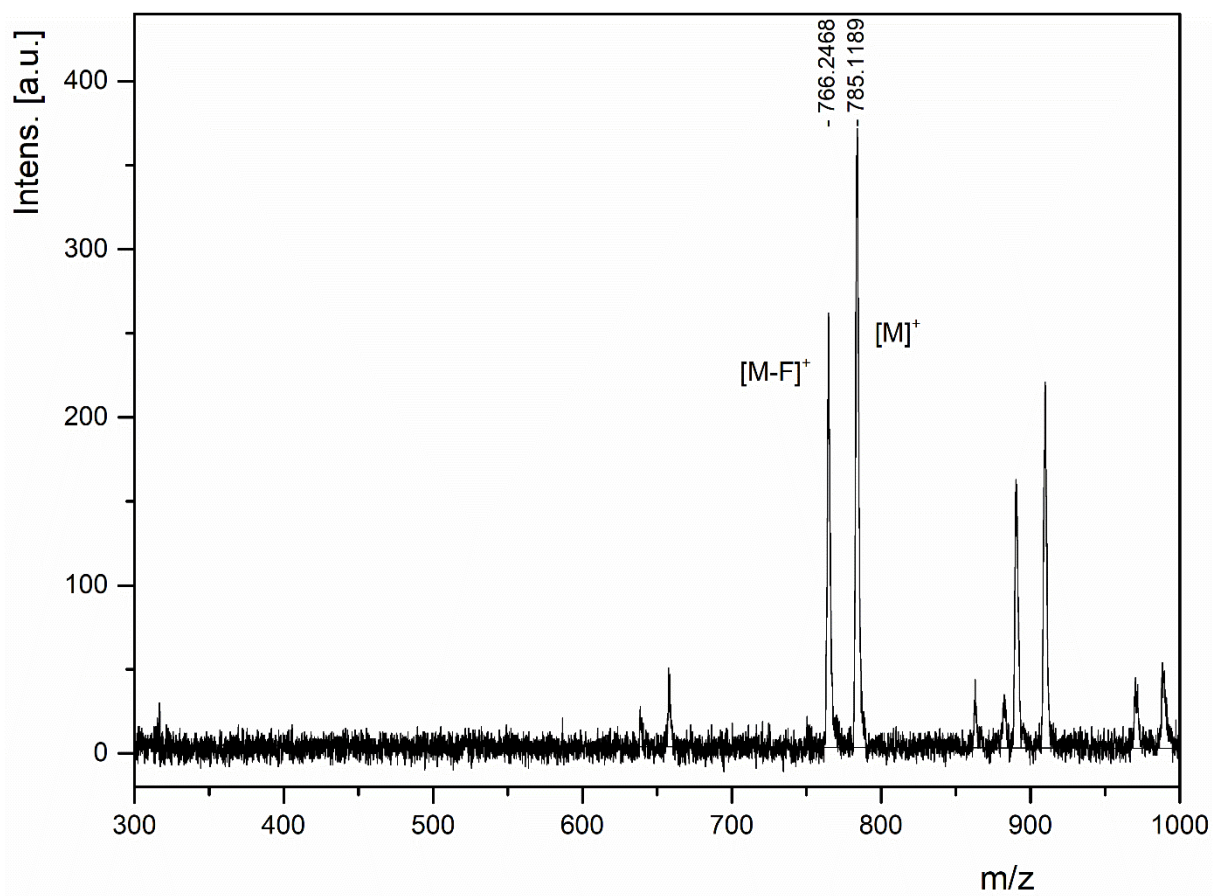

**Fig. S16** MALDI-MS spectrum of compound **13**

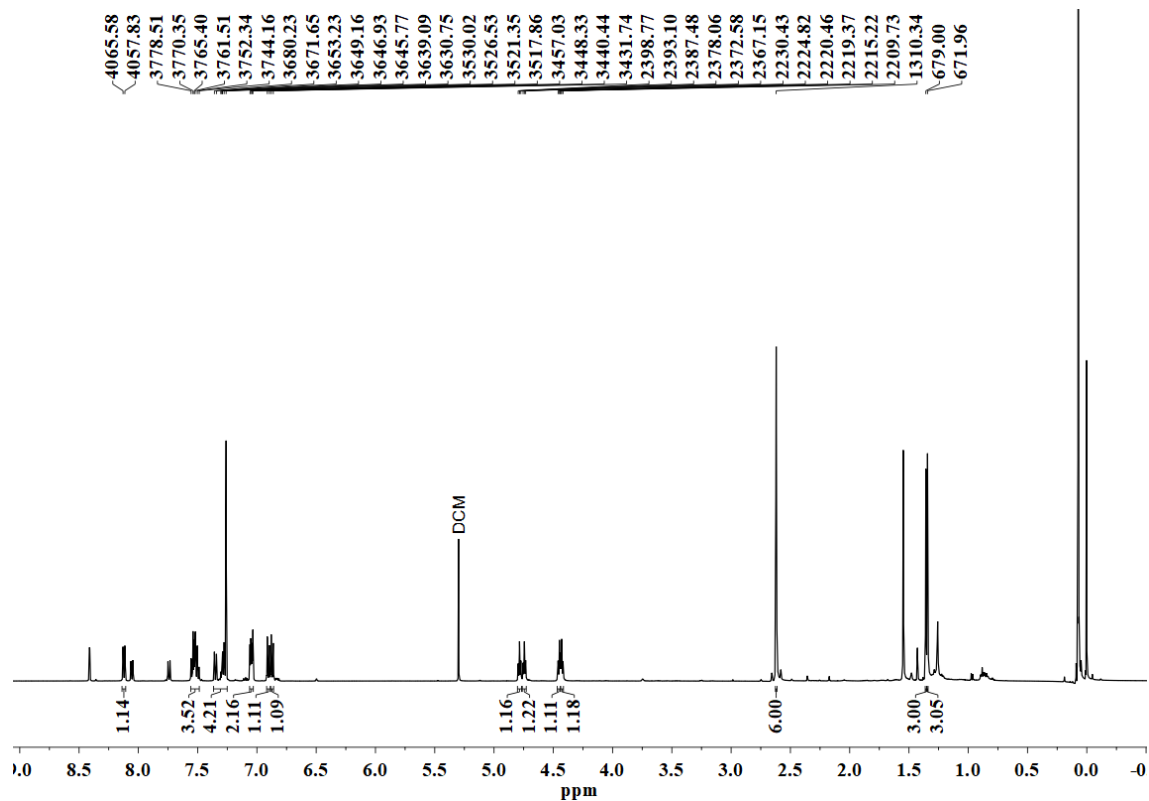

Fig. S17  $^1\text{H}$  NMR spectrum of compound **13** in  $\text{CDCl}_3$

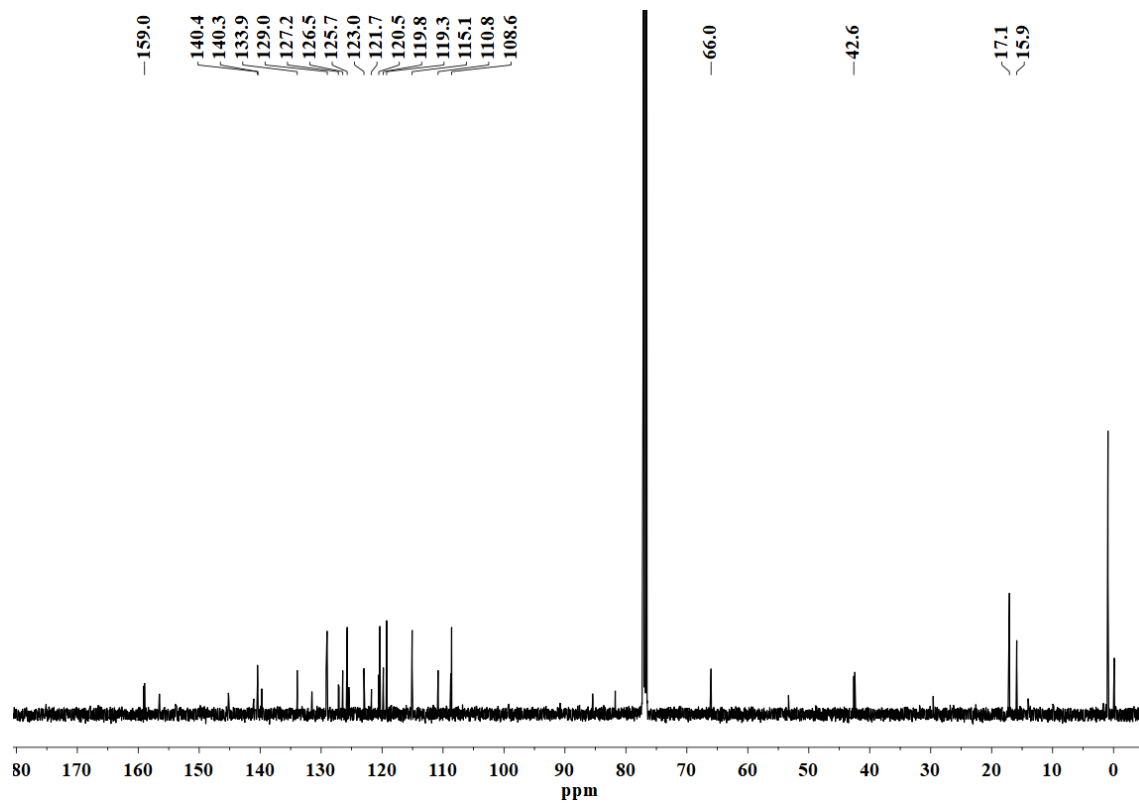

Fig. S18  $^{13}\text{C}$  NMR spectrum of compound **13** in  $\text{CDCl}_3$

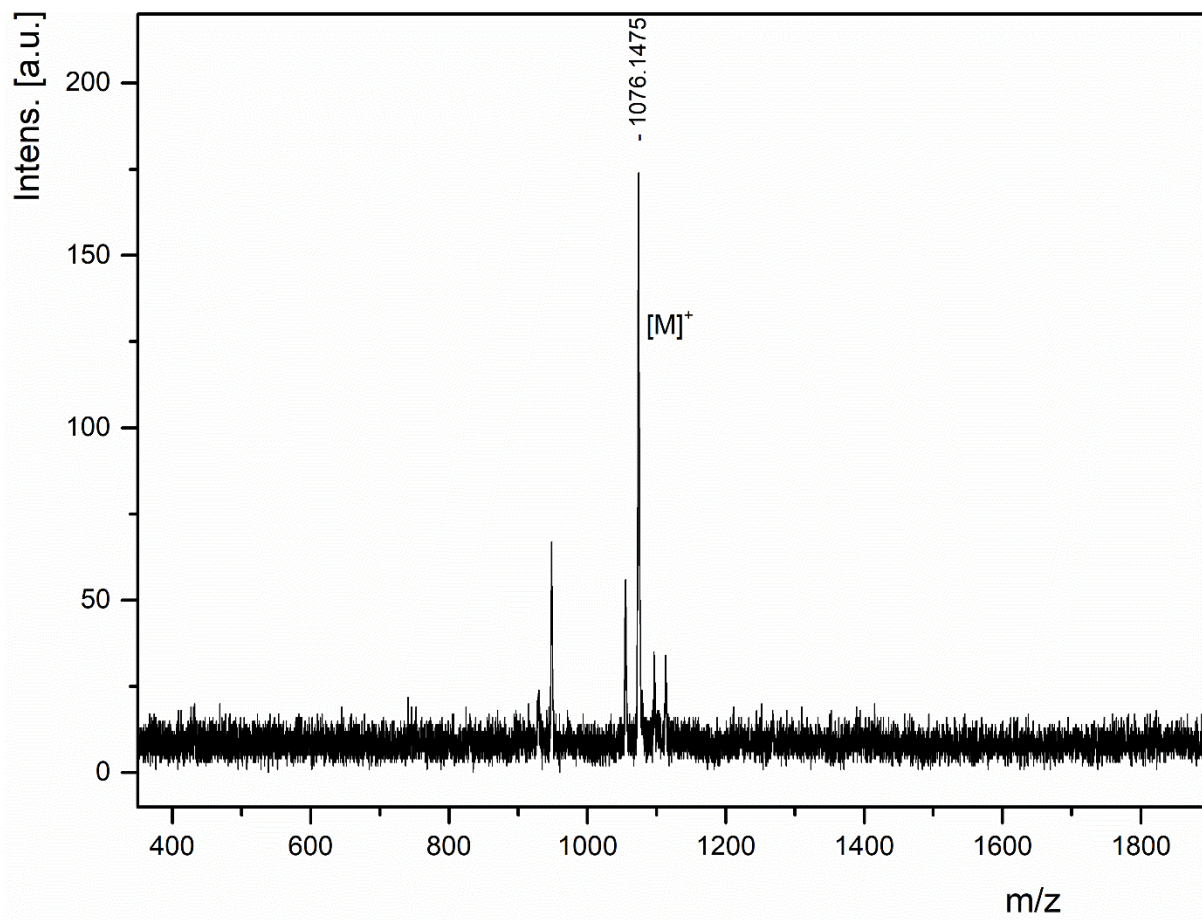

**Fig. S19** MALDI-MS spectrum of compound **14**

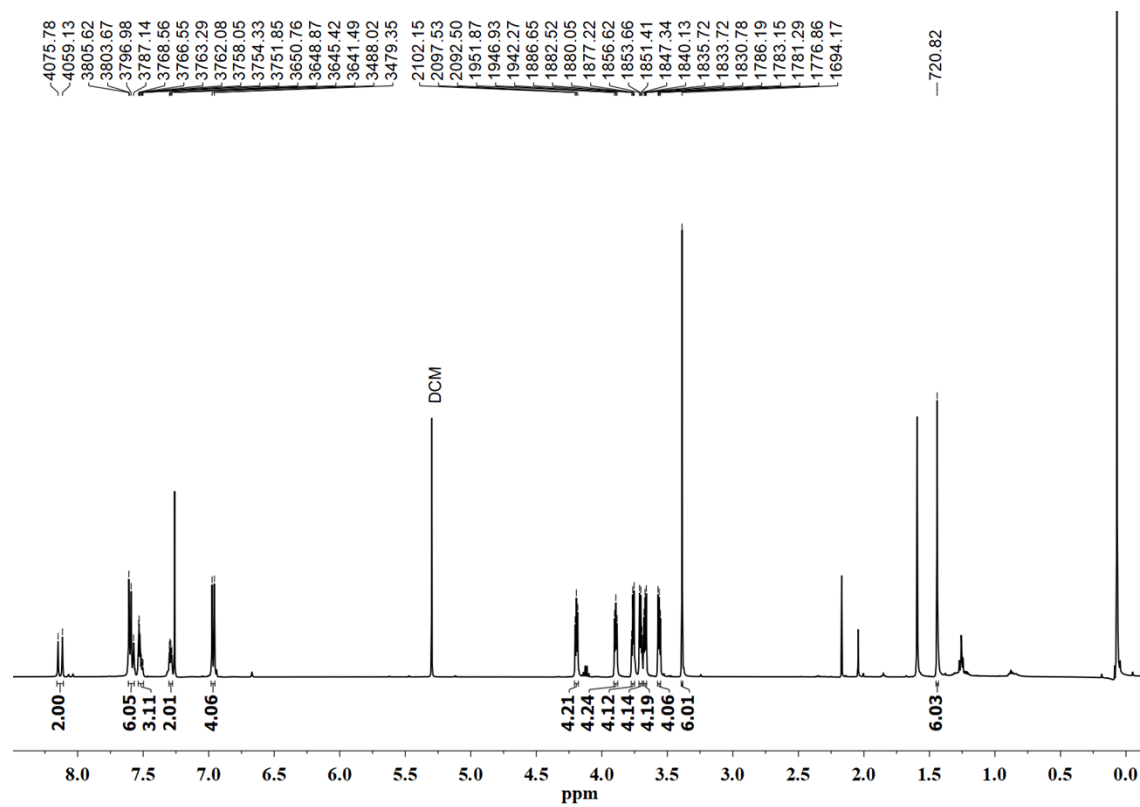

Fig. S20  $^1\text{H}$  NMR spectrum of compound **14** in  $\text{CDCl}_3$

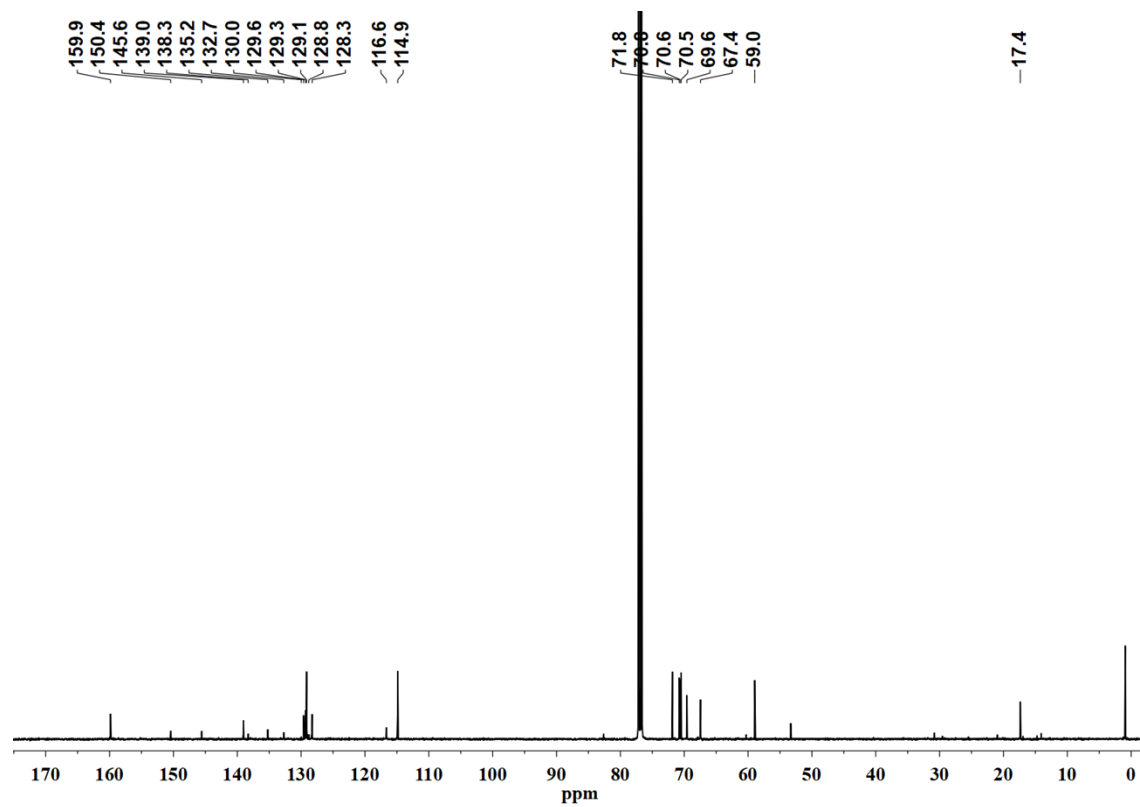

Fig. S21  $^{13}\text{C}$  NMR spectrum of compound 14 in  $\text{CDCl}_3$

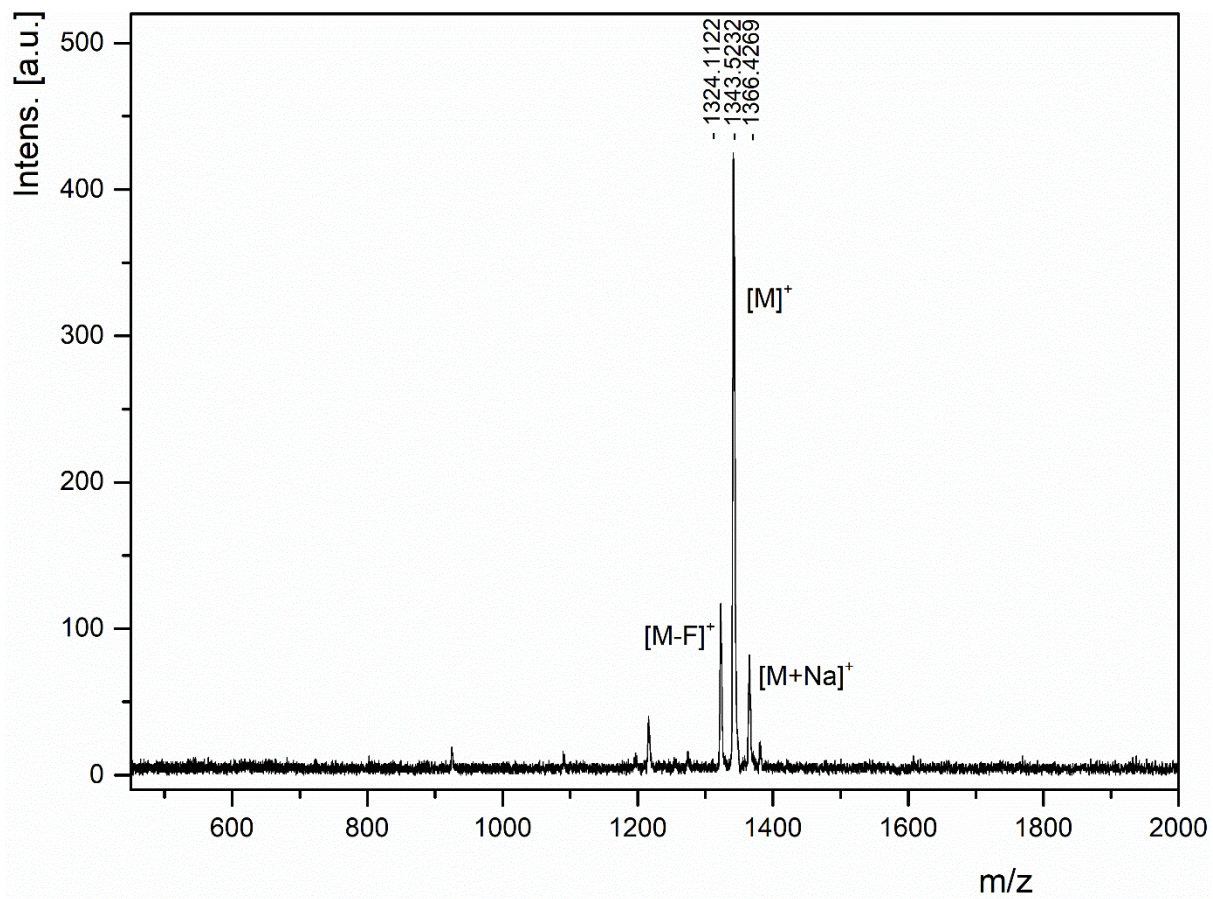

**Fig. S22** MALDI-MS spectrum of compound **15**

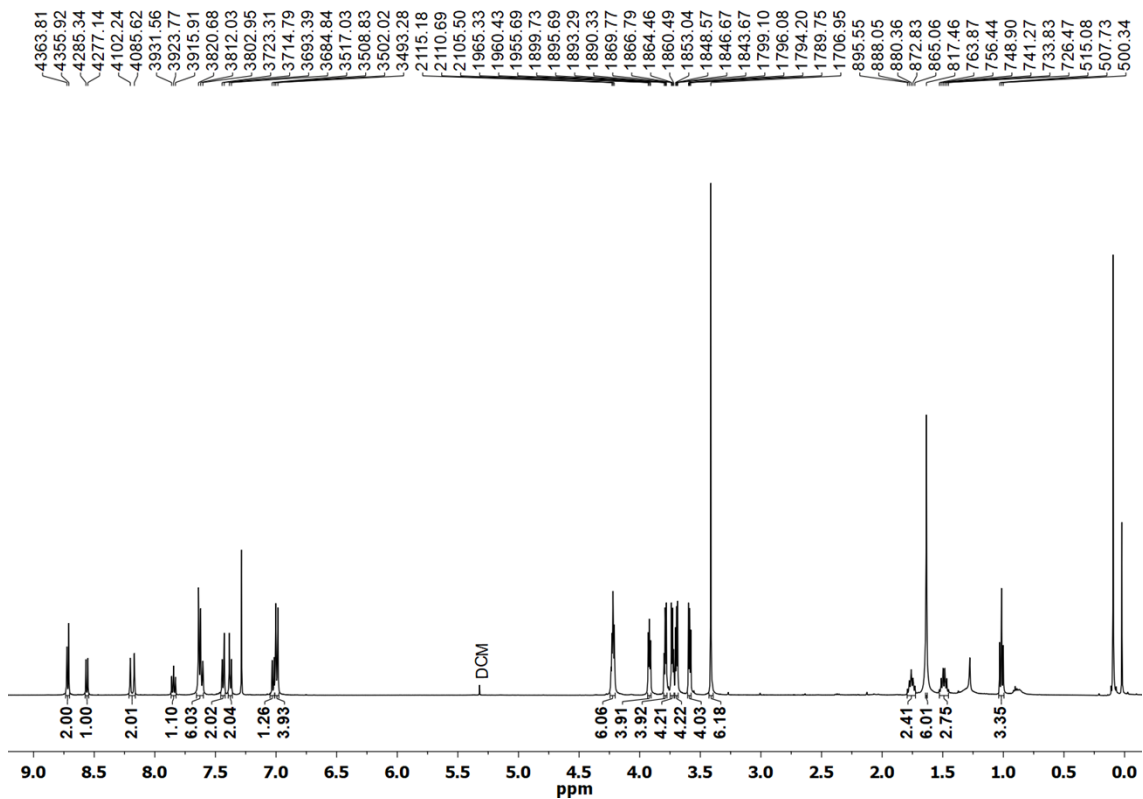

Fig. S23  $^1\text{H}$  NMR spectrum of compound **15** in  $\text{CDCl}_3$

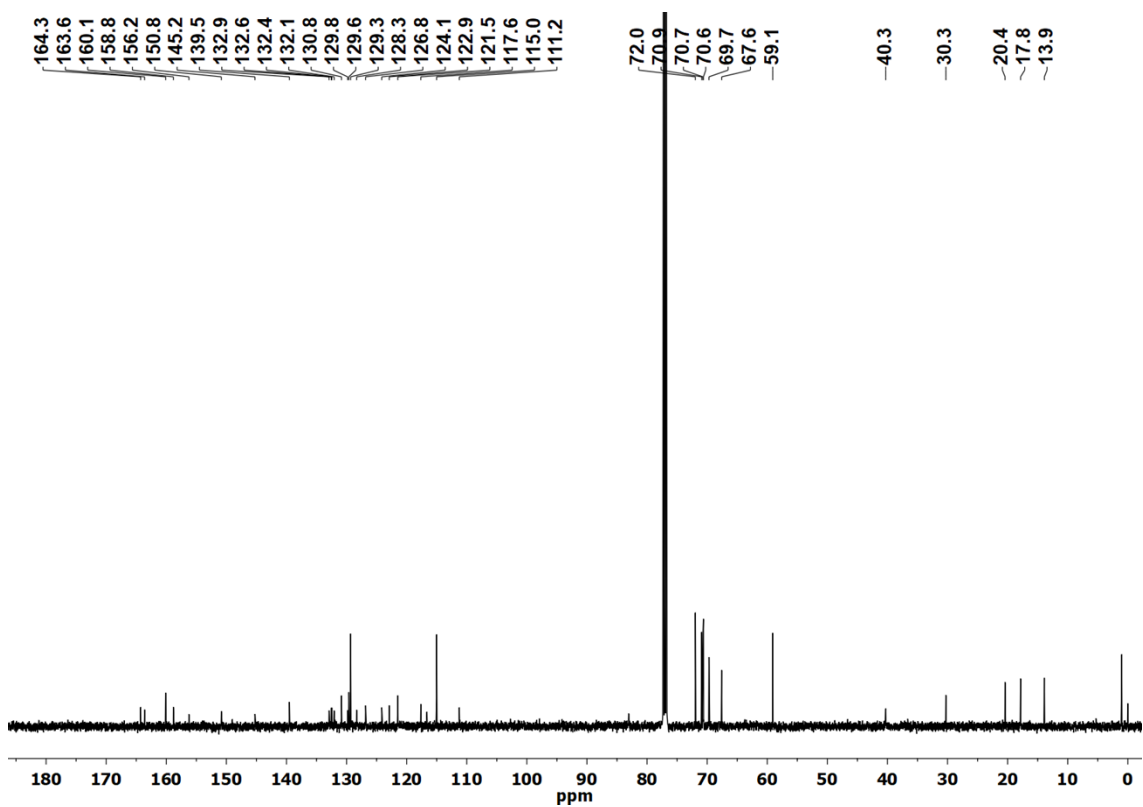

Fig. S24  $^{13}\text{C}$  NMR spectrum of compound **15** in  $\text{CDCl}_3$



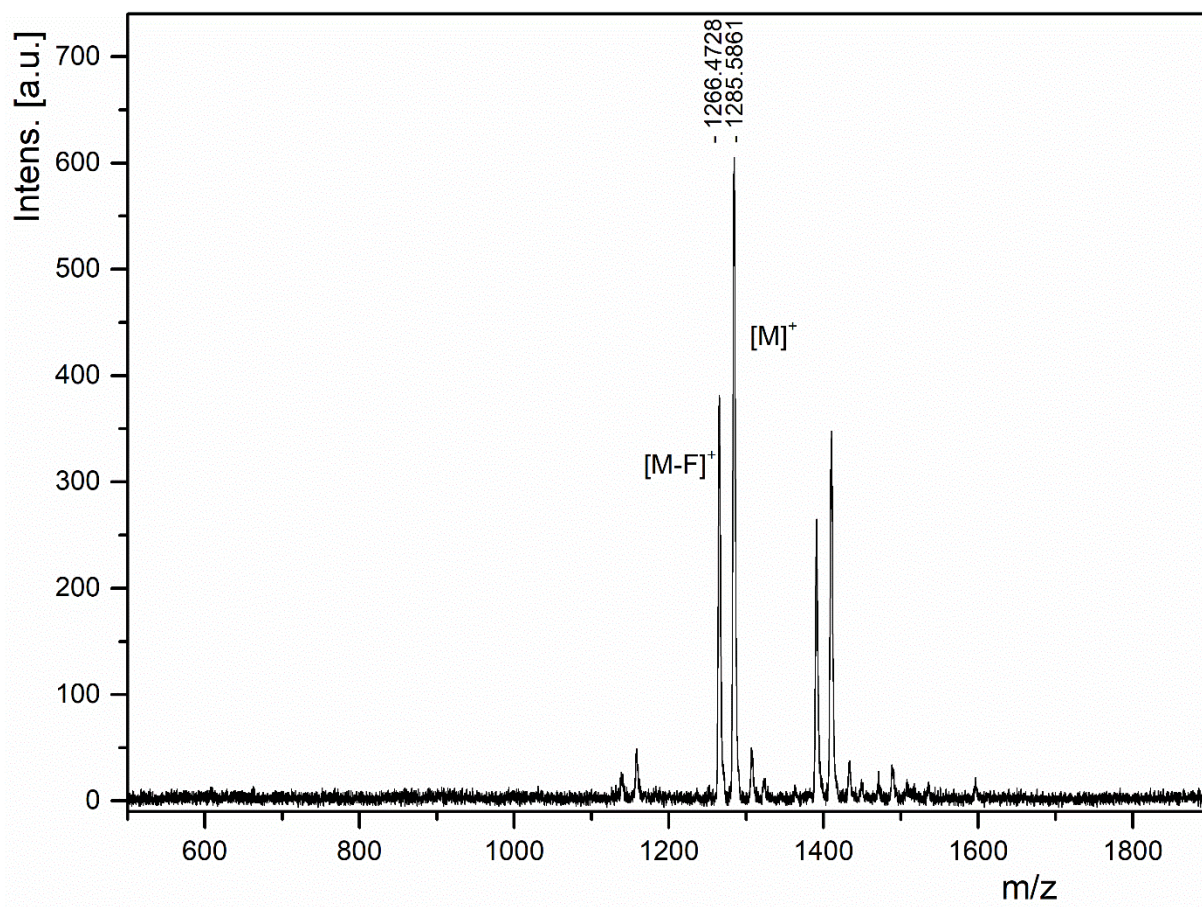

**Fig. S25** MALDI-MS spectrum of compound **16**

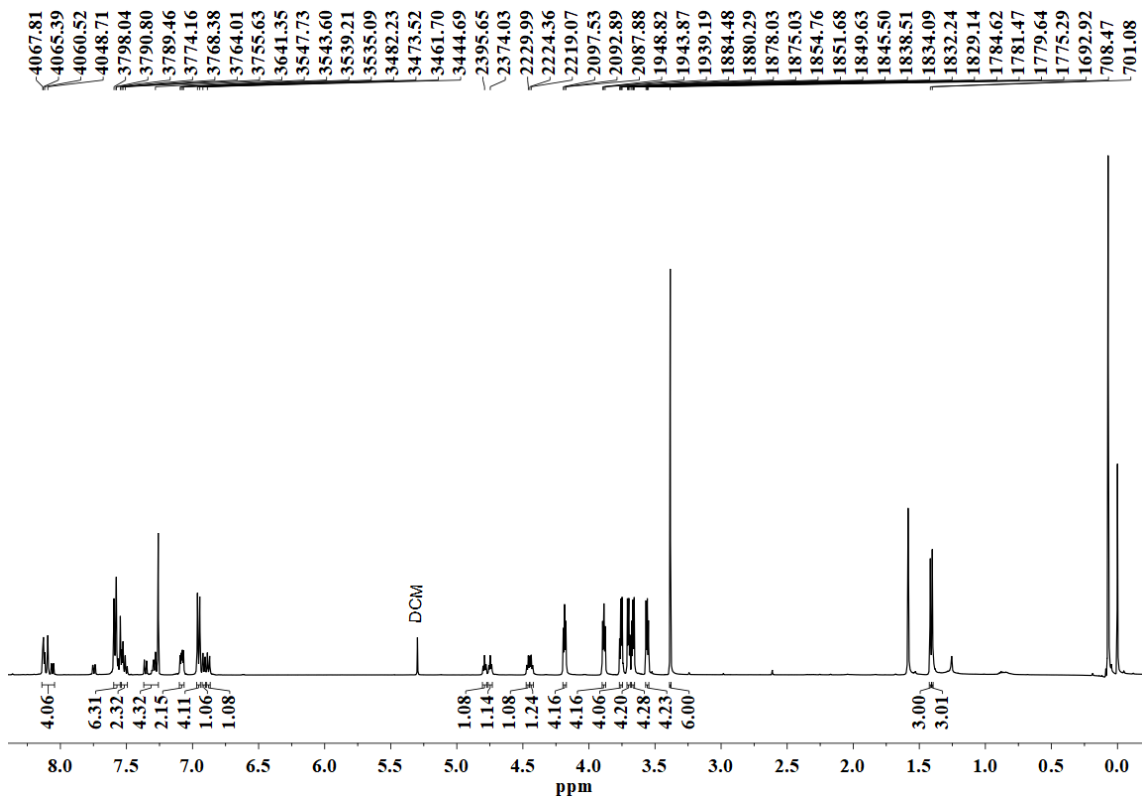

Fig. S26  $^1\text{H}$  NMR spectrum of compound **16** in  $\text{CDCl}_3$

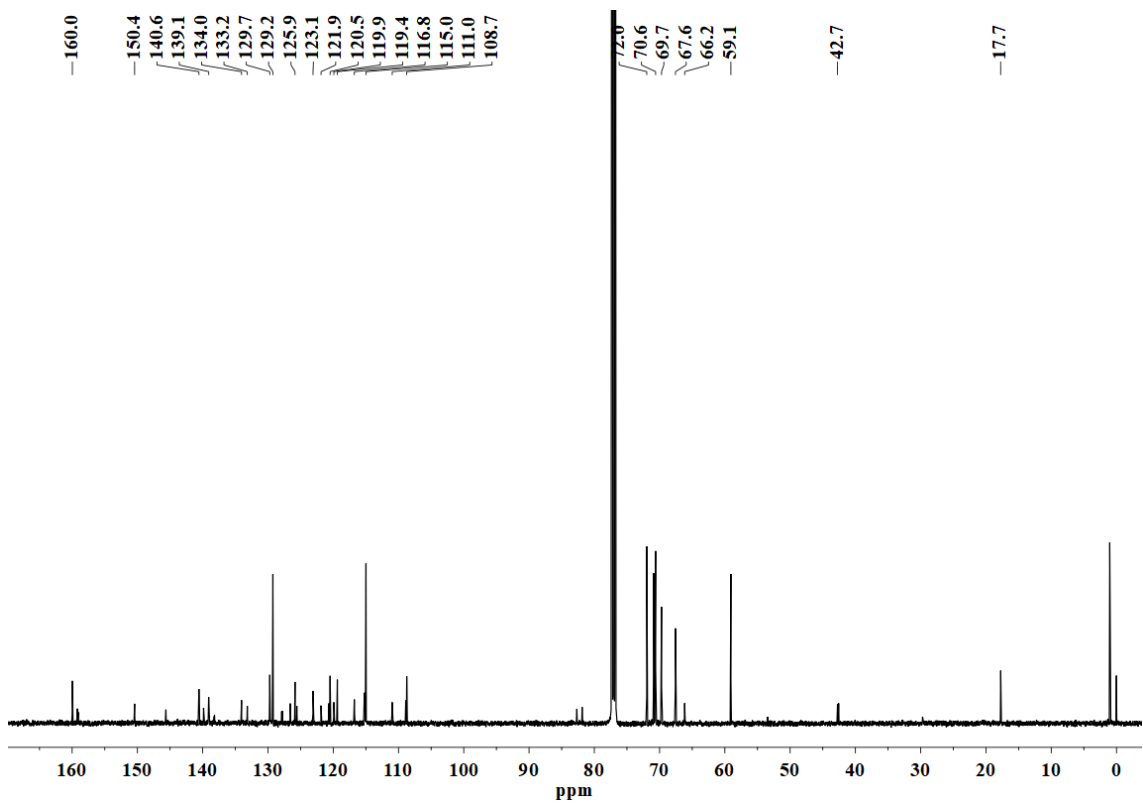

Fig. S27  $^{13}\text{C}$  NMR spectrum of compound **16** in  $\text{CDCl}_3$

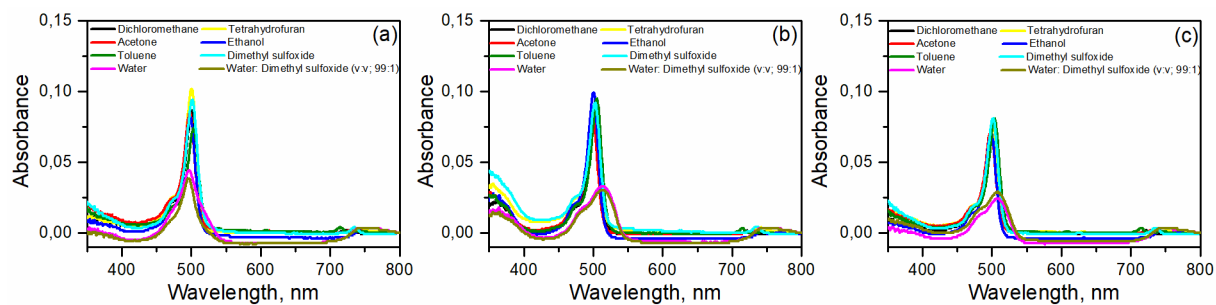

**Fig. S28** Absorbance spectra of compounds (a) **8**, (b) **9** and (c) **10** in different solvents (1  $\mu\text{M}$ )

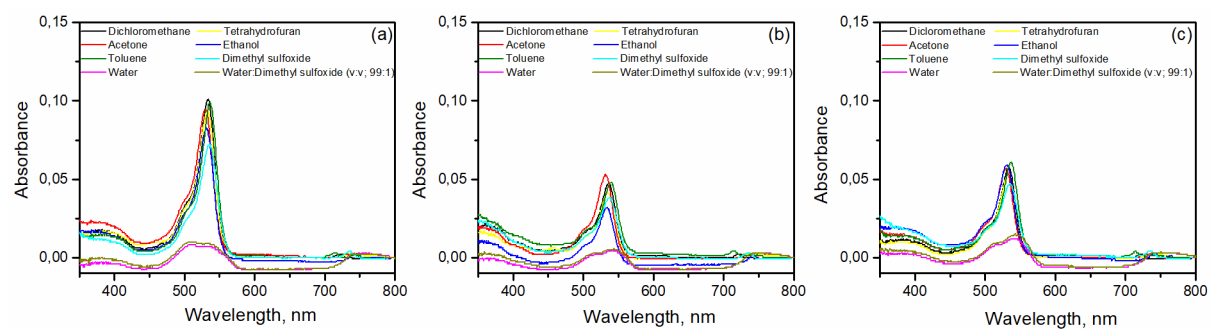

**Fig. S29** Absorbance spectra of compounds (a) **11**, (b) **12** and (c) **13** in different solvents (1  $\mu\text{M}$ )

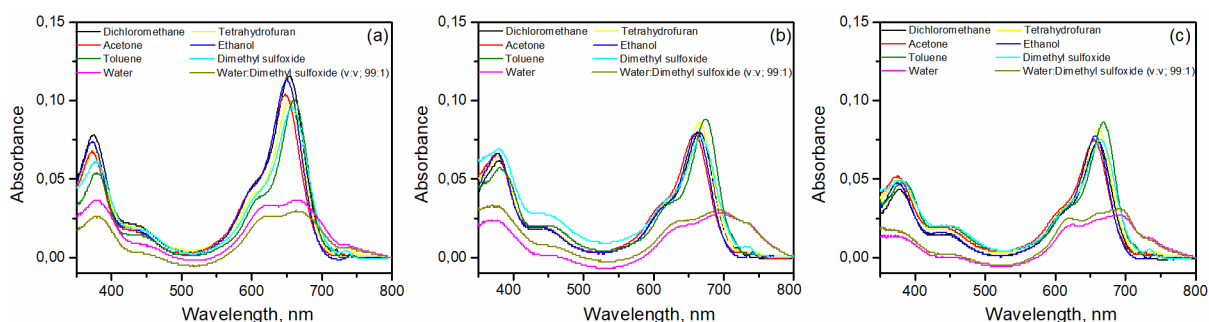

**Fig. S30** Absorbance spectra of compounds (a) **14**, (b) **15** and (c) **16** in different solvents (1  $\mu\text{M}$ )

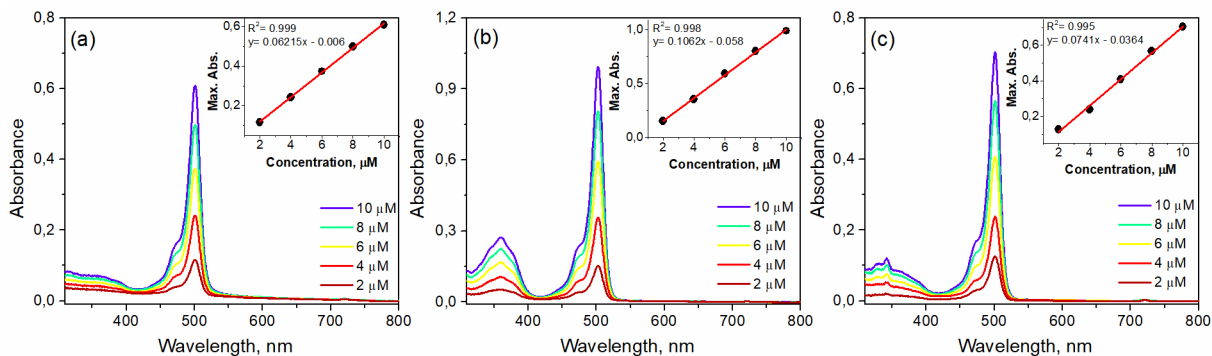

**Fig. S31** Absorption spectra of compounds (a) **8**, (b) **9** and (c) **10** in DCM at different concentrations

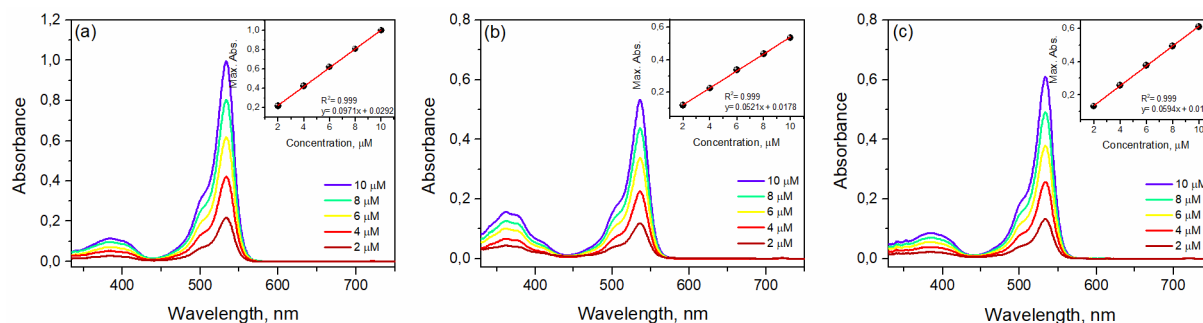

**Fig. S32** Absorption spectra of compounds (a) 11, (b) 12 and (c) 13 in DCM at different concentrations

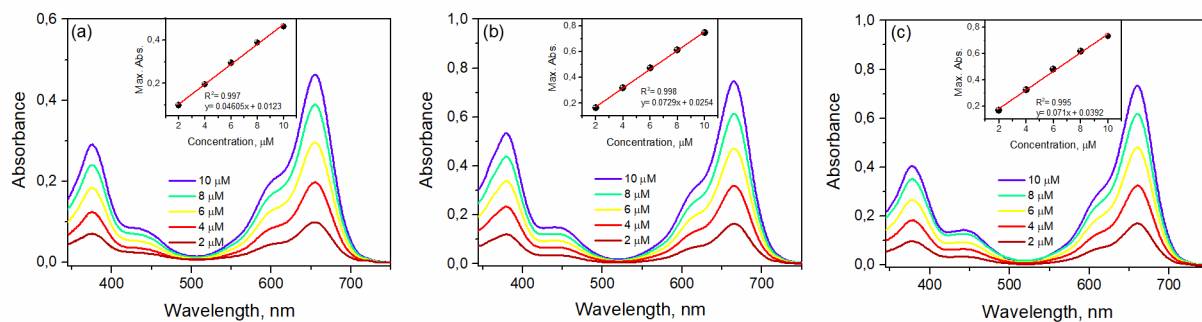

**Fig. S33** Absorption spectra of compounds (a) 14, (b) 15 and (c) 16 in DCM at different concentrations

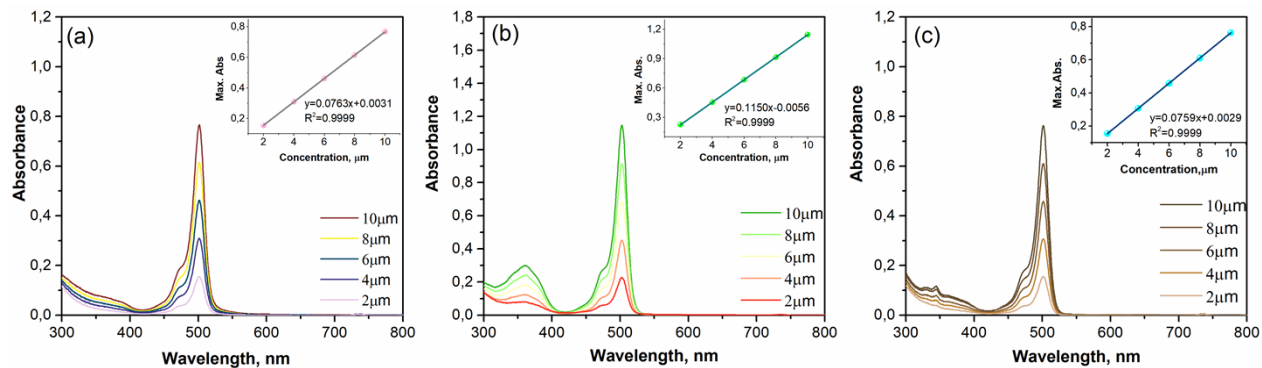

**Fig. S34** Absorption spectra of compounds (a) 8, (b) 9 and (c) 10 in DMSO at different concentrations

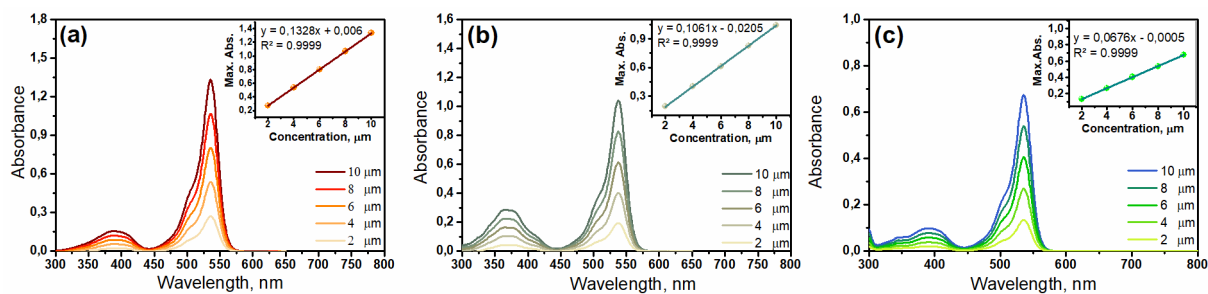

**Fig. S35** Absorption spectra of compounds (a) 11, (b) 12 and (c) 13 in DMSO at different

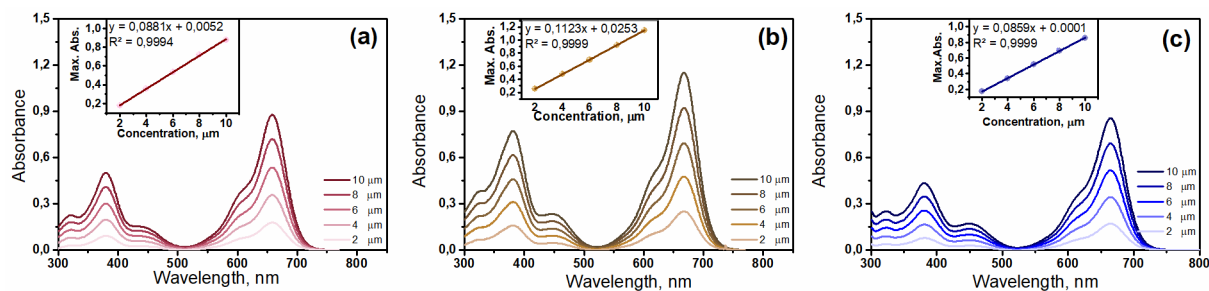

**Fig. S36** Absorption spectra of compounds (a) 14, (b) 15 and (c) 16 in DMSO at different concentrations

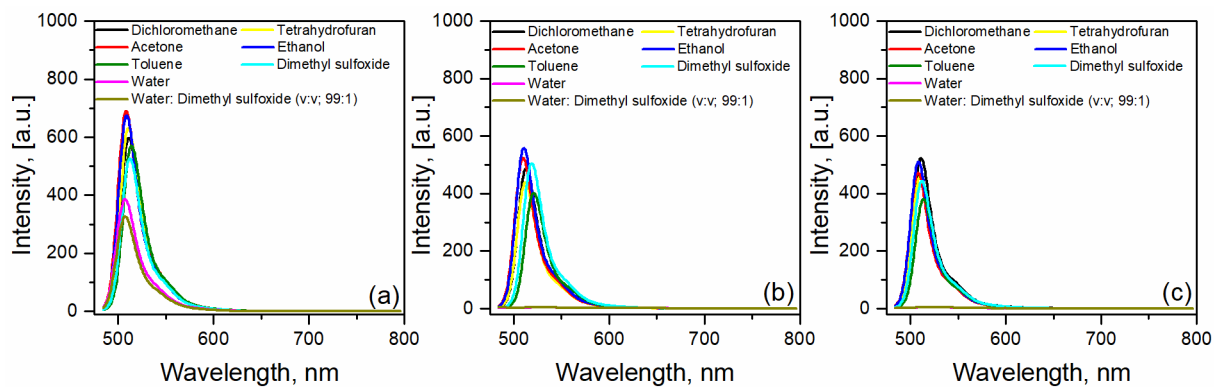

**Fig. S37** Fluorescence spectra of compounds (a) 8, (b) 9 and (c) 10 (0.5 μM,  $\lambda_{ex}$ :470 nm) in different solvents

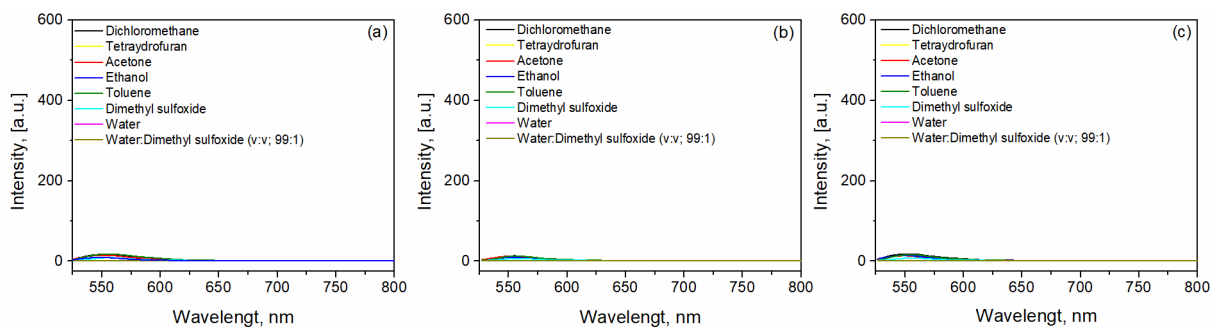

**Fig. S38** Fluorescence spectra of compounds (a) **11** ( $\lambda_{\text{ex}}$ :500 nm), (b) **12** ( $\lambda_{\text{ex}}$ :510 nm) and (c) **13** ( $\lambda_{\text{ex}}$ :510 nm), in different solvents (0.5  $\mu\text{M}$ )

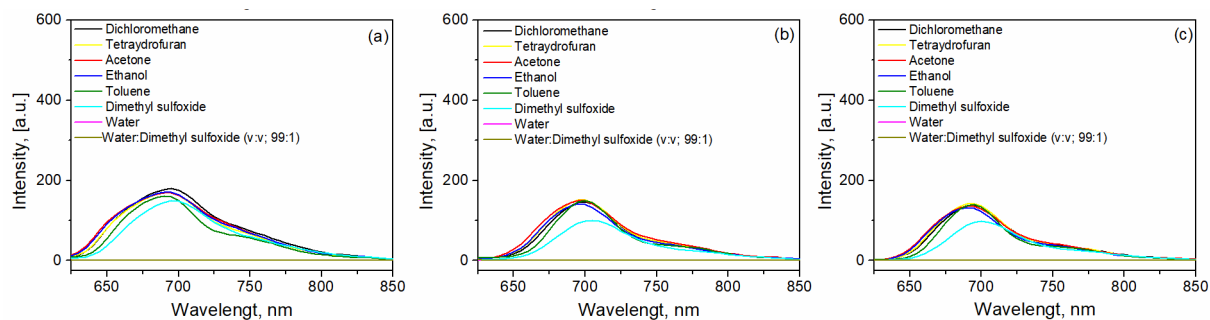

**Fig. S39** Fluorescence spectra of compounds (a) **14** ( $\lambda_{\text{ex}}$ :500 nm), (b) **15** ( $\lambda_{\text{ex}}$ :510 nm) and (c) **16** ( $\lambda_{\text{ex}}$ :510 nm), in different solvents (0.5  $\mu\text{M}$ )

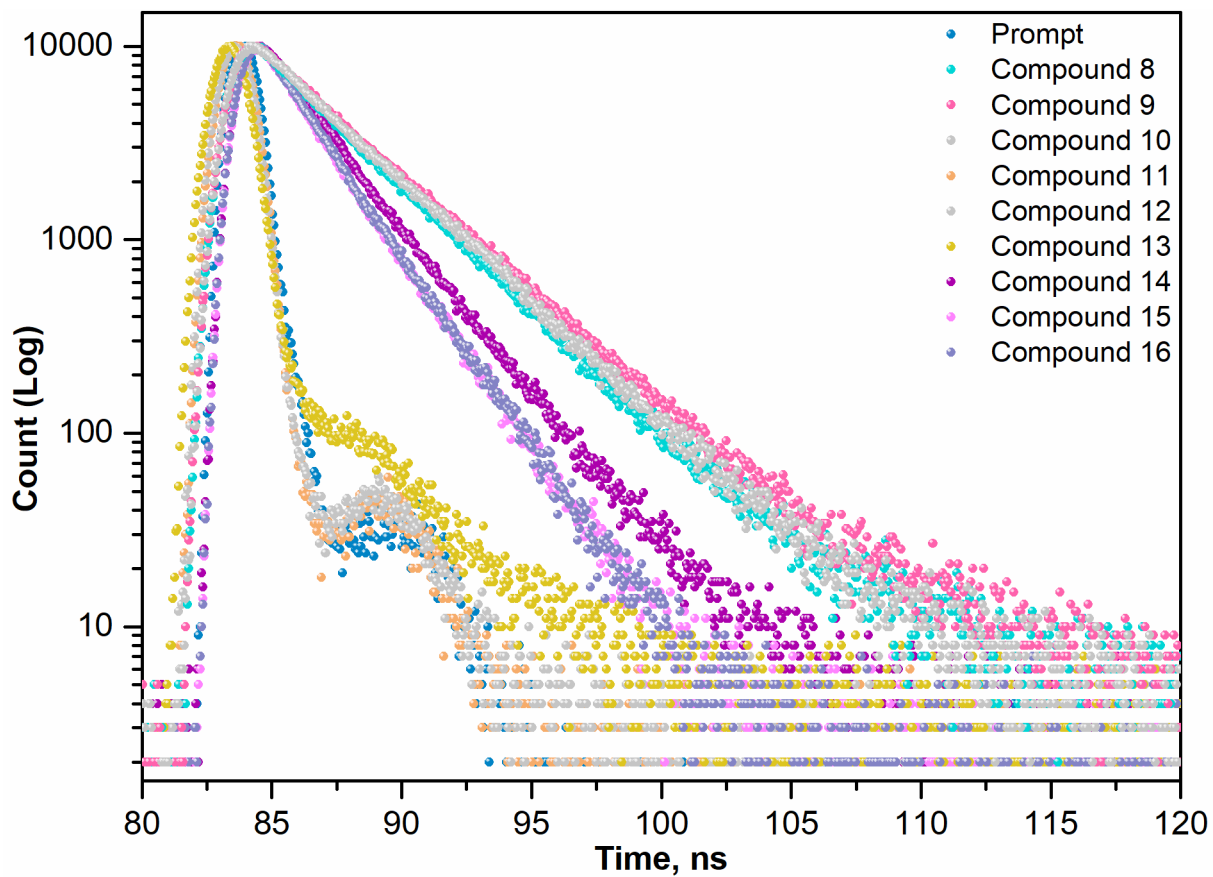

**Fig. S40** Fluorescence decay profiles of compounds **11-16** in DCM

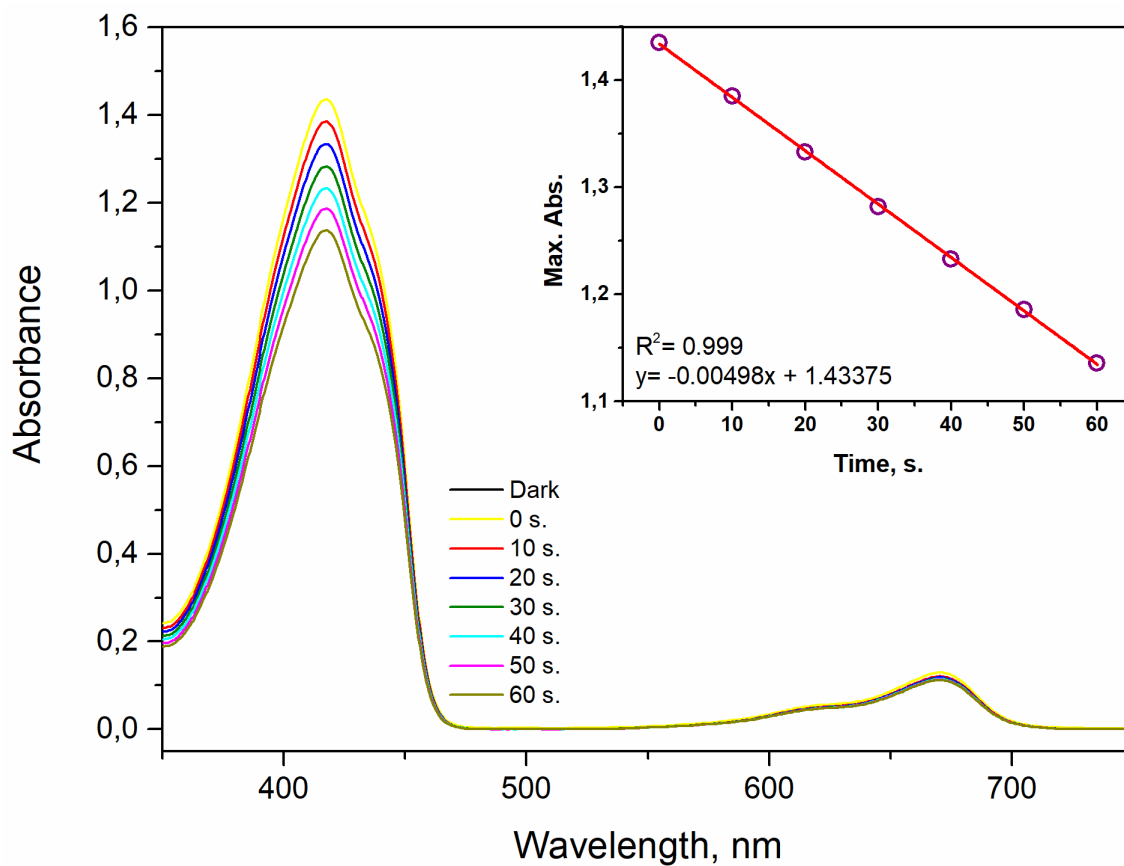

**Fig. S41** Decrease in absorbance spectra of DPBF in the presence of MB in DMSO



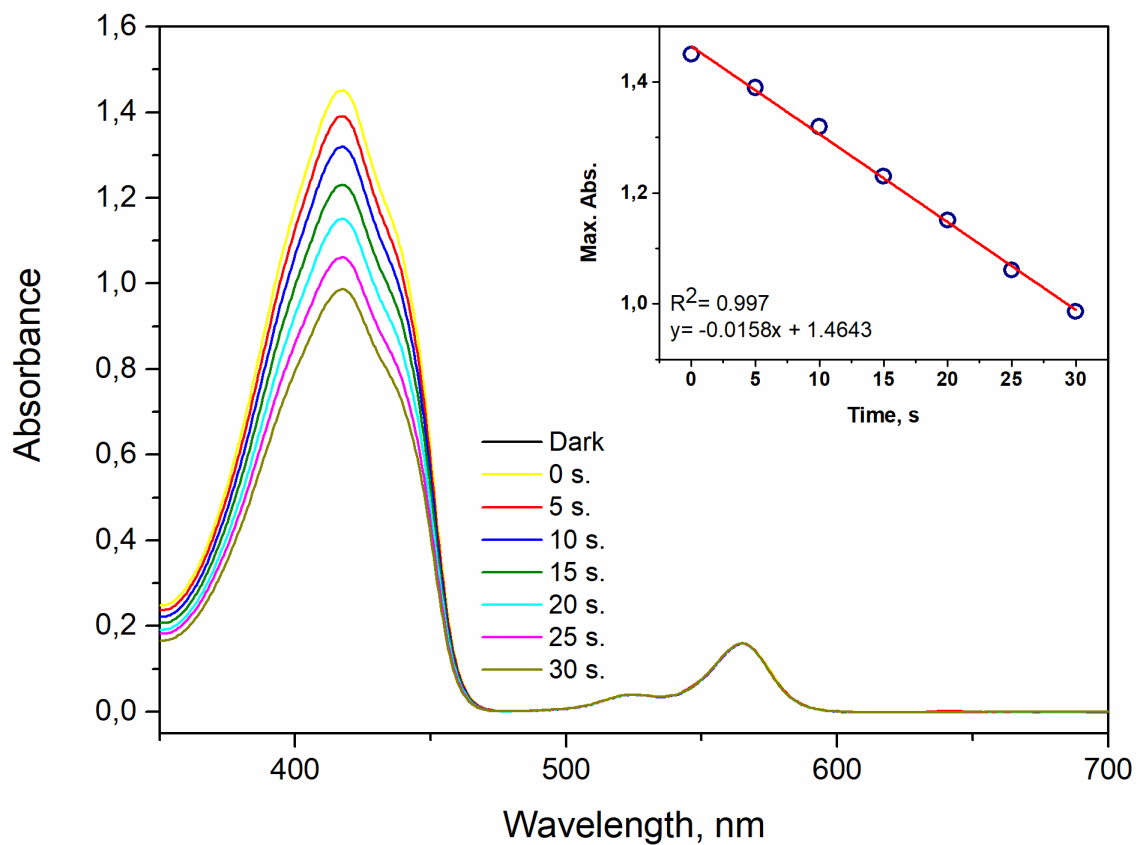

**Fig. S42** Decrease in absorbance spectra of DPBF in the presence of RB in DMSO

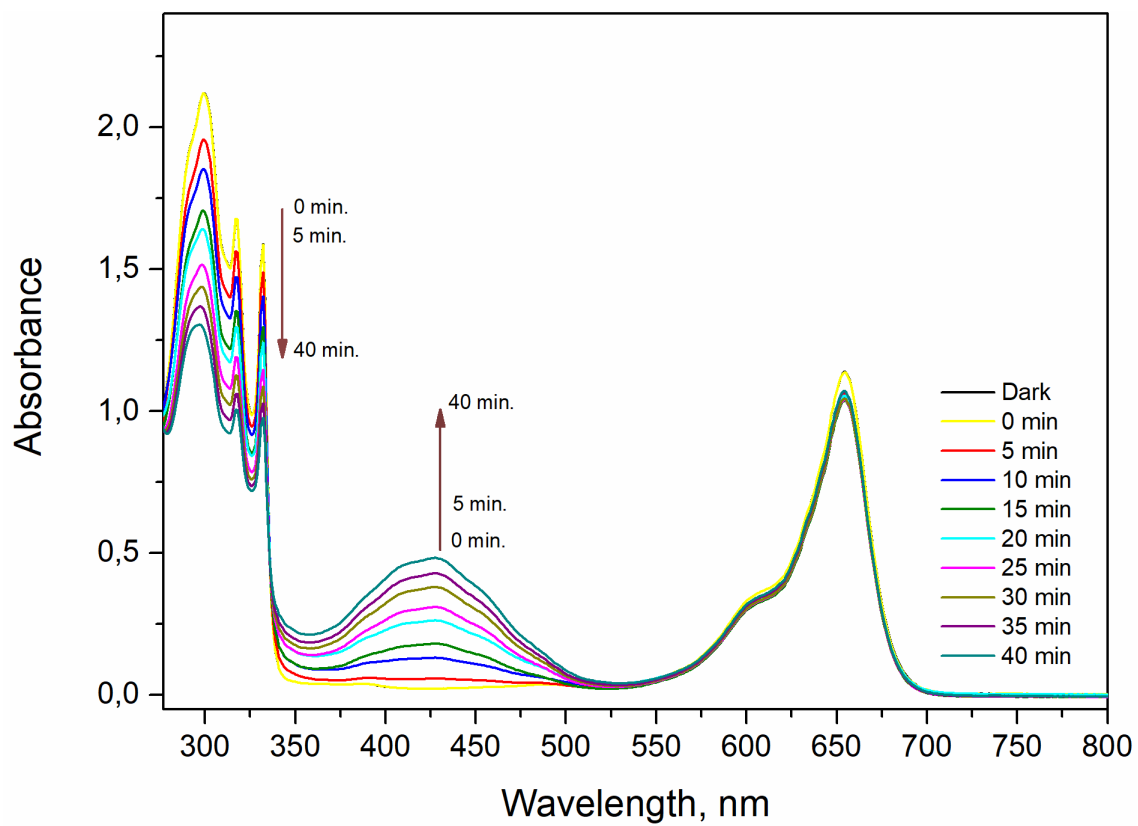

**Fig. S43** Decrease in absorbance spectra of DHN in the presence of MB

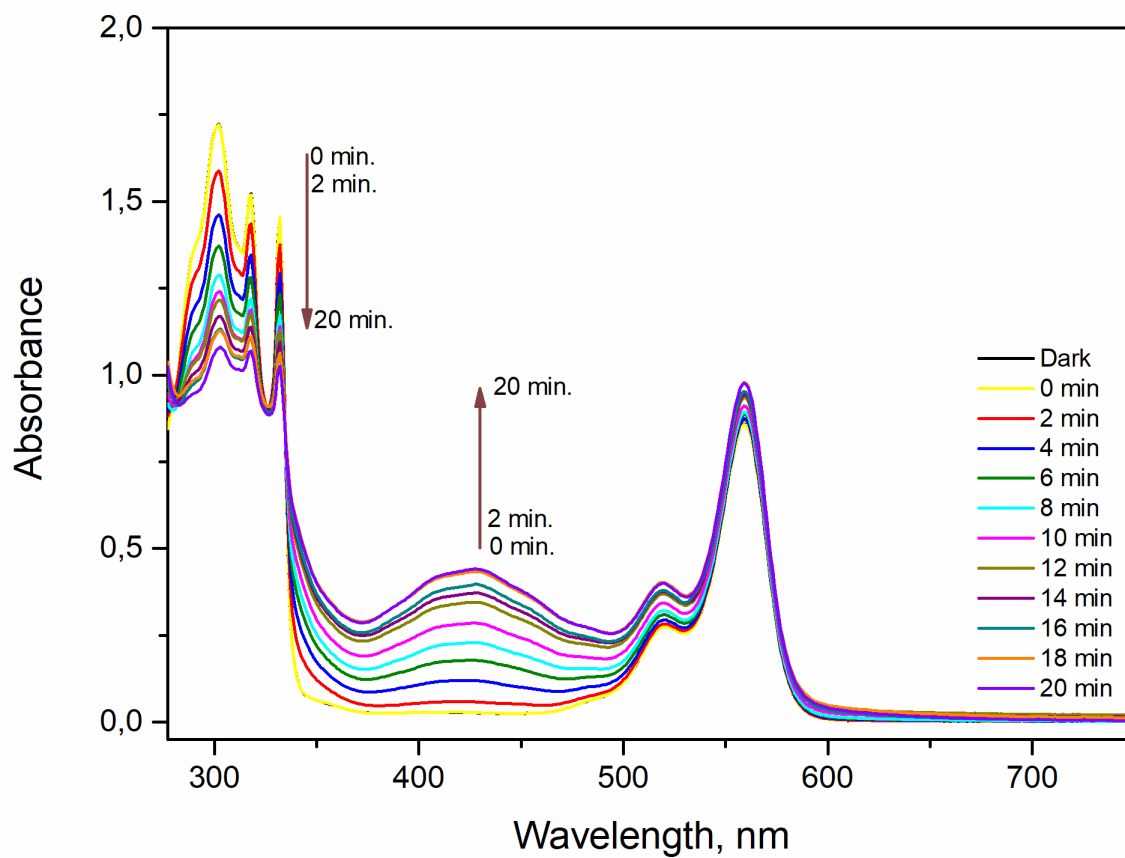

**Fig. S44** Decrease in absorbance spectra of DHN in the presence of RB
